# Supplementary material for: Solvent-induced dual nucleophiles and the α-effect in the SN2 versus E2 competition
Source: Royal Society of Chemistry journal article supplement (doi:10.1039/d4cp00671b), 2024-01-01
Supplement: d4cp00671b2.pdf [file d4cp00671b2.pdf]

## Supporting Information

### **Solvent-Induced Dual Nucleophiles and the $\alpha$ -Effect in the $S_N2$ *versus* E2 Competition**

Xiangyu Wu<sup>[a]</sup>, F. Matthias Bickelhaupt<sup>\*[b,c,d]</sup>, Jing Xie<sup>\*[a]</sup>

- [a] X. Wu, Prof. Dr. J. Xie  
Key Laboratory of Cluster Science of Ministry of Education, Beijing Key Laboratory of Photoelectronic /  
Electrophotonic Conversion Materials, School of Chemistry and Chemical Engineering, Beijing Institute of  
Technology, Beijing, 100081, China.  
E-mail: Jing Xie, jingxie@bit.edu.cn
- [b] Prof. Dr. F. M. Bickelhaupt  
Department of Chemistry and Pharmaceutical Sciences, AIMMS, Vrije Universiteit Amsterdam, De  
Boelelaan 1108, 1081 HZ Amsterdam (The Netherlands)  
E-mail: f.m.bickelhaupt@vu.nl
- [c] Prof. Dr. F. Matthias Bickelhaupt  
Institute for Molecules and Materials (IMM), Radboud University Nijmegen, Heyendaalseweg 135, 6525 AJ  
Nijmegen (The Netherlands)
- [d] Prof. Dr. F. Matthias Bickelhaupt  
Department of Chemical Sciences, University of Johannesburg, Auckland Park, Johannesburg 2006 (South  
Africa)

## Table of Contents

|                                                                                                                                                                                                                                                                                                                                                                                             |            |
|---------------------------------------------------------------------------------------------------------------------------------------------------------------------------------------------------------------------------------------------------------------------------------------------------------------------------------------------------------------------------------------------|------------|
| <b>Table S1</b> Comparison of reaction enthalpies for $\text{HOO}^- + \text{CH}_3\text{CH}_2\text{Cl}$ using different methods                                                                                                                                                                                                                                                              | <b>S1</b>  |
| <b>Table S2</b> Difference in overall barriers between anti-E2 and inv- $\text{S}_{\text{N}}2$ pathways of $\text{HOO}^-(\text{H}_2\text{O})_n + \text{CH}_3\text{CH}_2\text{Cl}$ reactions with the electronic energy ( $E$ ), enthalpy ( $H$ , 298.15 K) and Gibbs free energy ( $G$ , 298.15 K)                                                                                          | <b>S2</b>  |
| <b>Table S3</b> Difference in overall barriers between $\text{HOO}^-_{\text{W}}$ and $\text{HO}^-_{\text{PT}}$ pathways of $\text{HOO}^-(\text{H}_2\text{O})_n + \text{CH}_3\text{CH}_2\text{Cl}$ reactions with the electronic energy ( $E$ ), enthalpy ( $H$ , 298.15 K) and Gibbs free energy ( $G$ , 298.15 K)                                                                          | <b>S3</b>  |
| <b>Table S4.</b> Orbital energy of the HOMO of $\text{HOO}^-(\text{H}_2\text{O})_{n=0-4}$ and of $\text{HO}^-(\text{H}_2\text{O})_{n=0-4}$ .                                                                                                                                                                                                                                                | <b>S4</b>  |
| <b>Table S5.</b> Proton affinities (PA) and ethyl cation affinities (ECA) of anions.                                                                                                                                                                                                                                                                                                        | <b>S5</b>  |
| <b>Table S6.</b> Distortion index ( $\%D^\ddagger$ ) of transition states.                                                                                                                                                                                                                                                                                                                  | <b>S6</b>  |
| <b>Table S7.</b> NPA atom charges $q$ for transition states of $\text{HOO}^-(\text{H}_2\text{O})_n + \text{CH}_3\text{CH}_2\text{Cl}$ reactions.                                                                                                                                                                                                                                            | <b>S7</b>  |
| <b>Figure S1.</b> Structures and relative energies $\Delta E$ of $\text{HOO}^-(\text{H}_2\text{O})_{0-4}$ cluster.                                                                                                                                                                                                                                                                          | <b>S8</b>  |
| <b>Figure S2.</b> Structures and relative energies $\Delta E$ (in kcal/mol) of various transition states of the $\text{HOO}^-_{\text{W}}\text{-S}_{\text{N}}2$ path of $\text{HOO}^-(\text{H}_2\text{O})_{0-4} + \text{CH}_3\text{CH}_2\text{Cl}$ .                                                                                                                                         | <b>S9</b>  |
| <b>Figure S3.</b> Structures and relative energies $\Delta E$ (in kcal/mol) of various transition states of the $\text{HOO}^-_{\text{W}}\text{-E2}$ path of $\text{HOO}^-(\text{H}_2\text{O})_{0-4} + \text{CH}_3\text{CH}_2\text{Cl}$ .                                                                                                                                                    | <b>S10</b> |
| <b>Figure S4.</b> Structures and relative energies $\Delta E$ (in kcal/mol) of various transition states of the $\text{HO}^-_{\text{PT}}\text{-S}_{\text{N}}2$ path of $\text{HO}^-(\text{H}_2\text{O})_{0-4} + \text{CH}_3\text{CH}_2\text{Cl}$ .                                                                                                                                          | <b>S11</b> |
| <b>Figure S5.</b> Structures and relative energies $\Delta E$ (in kcal/mol) of various transition states of the $\text{HO}^-_{\text{PT}}\text{-E2}$ path of $\text{HO}^-(\text{H}_2\text{O})_{0-4} + \text{CH}_3\text{CH}_2\text{Cl}$ .                                                                                                                                                     | <b>S12</b> |
| <b>Figure S6.</b> Structures and relative energies $\Delta E$ of reactant complexes and product complexes.                                                                                                                                                                                                                                                                                  | <b>S13</b> |
| <b>Figure S7.</b> Correlation of $\text{S}_{\text{N}}2$ and E2 reaction barrier heights $\Delta E^\ddagger$ with charge asymmetry $\Delta q(\text{Cl-O}) = q(\text{Cl}) - q(\text{O})$ .                                                                                                                                                                                                    | <b>S14</b> |
| <b>Figure S8.</b> The correlation between a) $\text{HOO}^-(\text{H}_2\text{O})_{n=0-4} + \text{CH}_3\text{CH}_2\text{Cl}$ , b) $\text{HO}^-(\text{HOOH})(\text{H}_2\text{O})_{n=0-3} + \text{CH}_3\text{CH}_2\text{Cl}$ , c) $\text{HO}^-(\text{H}_2\text{O})_{n=0-4} + \text{CH}_3\text{CH}_2\text{Cl}$ reaction barrier height $\Delta E^\ddagger$ and HOMO energy level of nucleophiles. | <b>S15</b> |

**Figure S9.** Activation strain analysis of transition states for  $\text{HOO}^-(\text{H}_2\text{O})_{n=0-4} + \text{CH}_3\text{CH}_2\text{Cl}$  reaction. **S16**

**Figure S10.** Occupied frontier orbitals computed at MP2/6-311++G(d,p). **S17**

**Figure S11.** Correlation of  $\text{HOO}^-(\text{H}_2\text{O})_{n=0-4} + \text{CH}_3\text{CH}_2\text{Cl}$  reaction barrier height  $\Delta H^\ddagger$  with PA. **S18**

**Table S8.** Deviation  $\Delta\Delta H^\ddagger$  of reaction barriers  $\Delta H^\ddagger(\text{HO}^- \text{ Brønsted path PA})$  derived from the proton-affinity-based  $\text{HO}^-_{\text{PT}}$  and the  $\text{HO}^-_{\text{W}}$  Brønsted-correlation path from the actual  $\Delta H^\ddagger(\text{HOO}^-)$  values of  $\text{HOO}^-(\text{H}_2\text{O})_{n=0-4} + \text{CH}_3\text{CH}_2\text{Cl}$ . **S19**

**Figure S12.** Correlation of  $\text{HO}^-(\text{H}_2\text{O})_{n=0-4} + \text{CH}_3\text{CH}_2\text{Cl}$  reaction barrier height  $\Delta H^\ddagger$  with ECA. **S20**

**Table S9.** Deviation  $\Delta\Delta H^\ddagger$  of reaction barriers  $\Delta H^\ddagger(\text{HO}^- \text{ Brønsted path ECA})$  derived from the ethyl-cation-affinity-based  $\text{HO}^-_{\text{PT}}$  and the  $\text{HO}^-_{\text{W}}$  Brønsted-correlation path from the actual  $\Delta H^\ddagger(\text{HOO}^-)$  values of  $\text{HOO}^-(\text{H}_2\text{O})_{n=0-4} + \text{CH}_3\text{CH}_2\text{Cl}$ . **S21**

**Figure S13.** Correlation of  $\text{HOO}^-(\text{H}_2\text{O})_{n=0-4} + \text{CH}_3\text{CH}_2\text{Cl}$  reaction barrier height  $\Delta H^\ddagger$  with PA or ECA. **S22**

**Figure S14.** Correlation of  $\text{HY}^-(\text{H}_2\text{O})_{n=0-3}$  ( $\text{Y} = \text{O}, \text{S}, \text{HN}$ ) +  $\text{CH}_3\text{CH}_2\text{Cl}$  reaction barrier height  $\Delta H^\ddagger$  with PA. **S23**

**Table S10.** Deviation  $\Delta\Delta H^\ddagger$  of reaction barriers  $\Delta H^\ddagger(\text{HY}^- \text{ Brønsted path PA})$  derived from the proton-affinity-based  $\text{HY}^-$  Brønsted-correlation path of  $\text{HY}^-(\text{H}_2\text{O})_{n=0-3}$  ( $\text{Y} = \text{O}, \text{S}, \text{HN}$ ) +  $\text{CH}_3\text{CH}_2\text{Cl}$  from the actual  $\Delta H^\ddagger(\text{HOO}^-)$  values of  $\text{HOO}^-(\text{H}_2\text{O})_{n=0-3} + \text{CH}_3\text{CH}_2\text{Cl}$ . **S24**

**Figure S15.** Correlation of  $\text{HY}^-(\text{H}_2\text{O})_{n=0-3}$  ( $\text{Y} = \text{O}, \text{S}, \text{HN}$ ) +  $\text{CH}_3\text{CH}_2\text{Cl}$  reaction barrier height  $\Delta H^\ddagger$  with ECA. **S25**

**Table S11.** Deviation  $\Delta\Delta H^\ddagger$  of reaction barriers  $\Delta H^\ddagger(\text{HY}^- \text{ Brønsted path PA})$  derived from the ethyl-cation-affinity-based  $\text{HY}^-$  Brønsted-correlation path of  $\text{HY}^-(\text{H}_2\text{O})_{n=0-3}$  ( $\text{Y} = \text{O}, \text{S}, \text{HN}$ ) +  $\text{CH}_3\text{CH}_2\text{Cl}$  from the actual  $\Delta H^\ddagger(\text{HOO}^-)$  values of  $\text{HOO}^-(\text{H}_2\text{O})_{n=0-3} + \text{CH}_3\text{CH}_2\text{Cl}$ . **S26**

**Table S1** Comparison of reaction enthalpies (298.15 K, kcal/mol) for  $\text{HOO}^- + \text{CH}_3\text{CH}_2\text{Cl}$  using different methods.<sup>[a]</sup>

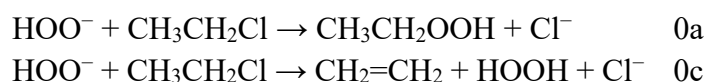

| Methods                 | $\Delta H_r(0\text{a})$ | $\Delta H_r(0\text{c})$ | MUE |
|-------------------------|-------------------------|-------------------------|-----|
| Expt. <sup>[b]</sup>    | -45.8                   | -24.5                   | 0.0 |
| CCSD(T)/aug-cc-pVTZ     | -46.0                   | -24.0                   | 0.3 |
| MP2/6-311++G(d,p)       | -45.0                   | -25.4                   | 0.9 |
| MP2/aug-cc-pVDZ         | -48.5                   | -27.9                   | 3.0 |
| MP2/aug-cc-pVTZ         | -45.6                   | -25.1                   | 0.5 |
| B97-1/aug-cc-pVDZ       | -47.9                   | -27.2                   | 2.4 |
| B97-1/aug-cc-pVTZ       | -46.4                   | -27.1                   | 1.6 |
| B3LYP/6-311++G(d,p)     | -47.2                   | -30.2                   | 3.5 |
| CAM-B3LYP/6-31+G(d,p)   | -49.0                   | -28.6                   | 3.5 |
| CAM-B3LYP/6-311++G(d,p) | -49.8                   | -27.5                   | 3.6 |

[a] All computational values were obtained in the present study.

[b] Reference for experiment formation enthalpies (in kcal/mol) of anions and neutral molecules in gas phase at 298.15 K

|                                    | $\Delta_f H$ | reference                                                       |
|------------------------------------|--------------|-----------------------------------------------------------------|
| $\text{HOO}^-$                     | -24.9        | <i>J. Am. Chem. Soc.</i> <b>1981</b> , 103, 6262                |
| $\text{Cl}^-$                      | -56.1        | <i>J. Phys. Chem. Ref. Data, Monograph 9</i> , <b>1998</b>      |
| $\text{CH}_3\text{CH}_2\text{Cl}$  | -26.9        | CRC Handbook of Chemistry and Physics, 85 <sup>th</sup> edition |
| $\text{CH}_3\text{CH}_2\text{OOH}$ | -41.5        | <i>J. Phys. Chem.</i> <b>1996</b> , 100, 8240–8249              |
| $\text{CH}_2=\text{CH}_2$          | 12.6         | <i>J. Phys. Chem. Ref. Data, Monograph 9</i> , <b>1998</b>      |
| $\text{HOOH}$                      | -32.7        | <i>J. Phys. Chem. Ref. Data, Monograph 9</i> , <b>1998</b>      |

**Table S2** Difference in overall barriers (in kcal/mol) between anti-E2 and inv-S<sub>N</sub>2 pathways of HOO<sup>-</sup>(H<sub>2</sub>O)<sub>n</sub> + CH<sub>3</sub>CH<sub>2</sub>Cl reactions with the electronic energy (*E*), enthalpy (*H*, 298.15 K) and Gibbs free energy (*G*, 298.15 K).<sup>[a]</sup>

|                                    | <b>n</b> | $\Delta\Delta^\ddagger = \Delta^\ddagger(\text{anti-E2}) - \Delta^\ddagger(\text{inv-S}_{\text{N}2})$ |                           |                           |
|------------------------------------|----------|-------------------------------------------------------------------------------------------------------|---------------------------|---------------------------|
|                                    |          | $\Delta\Delta E^\ddagger$                                                                             | $\Delta\Delta H^\ddagger$ | $\Delta\Delta G^\ddagger$ |
| <b>HOO<sup>-</sup><sub>w</sub></b> | 0        | 4.3                                                                                                   | 1.2                       | 0.4                       |
|                                    | 1        | 7.0                                                                                                   | 4.0                       | 2.7                       |
|                                    | 2        | 7.4                                                                                                   | 5.3                       | 6.0                       |
|                                    | 3        | 10.8                                                                                                  | 8.4                       | 6.8                       |
|                                    | 4        | 9.9                                                                                                   | 8.1                       | 7.0                       |
| <b>HO<sup>-</sup><sub>PT</sub></b> | 0        | 1.3                                                                                                   | -1.8                      | -2.6                      |
|                                    | 1        | 5.2                                                                                                   | 1.9                       | 0.1                       |
|                                    | 2        | 6.2                                                                                                   | 3.2                       | 1.1                       |
|                                    | 3        | 7.2                                                                                                   | 4.5                       | 2.6                       |
|                                    | 4        | 8.3                                                                                                   | 5.2                       | 4.5                       |

[a] Computed at CCSD(T)/aug-cc-pVTZ//MP2/6-311++G(d,p).

**Table S3** Difference in overall barriers (in kcal/mol) between  $\text{HOO}^-_{\text{w}}$  and  $\text{HO}^-_{\text{PT}}$  pathways of  $\text{HOO}^-(\text{H}_2\text{O})_n + \text{CH}_3\text{CH}_2\text{Cl}$  reactions with the electronic energy ( $E$ ), enthalpy ( $H$ , 298.15 K), and Gibbs free energy ( $G$ , 298.15 K).<sup>[a]</sup>

|                           | n | $\Delta\Delta^\ddagger = \Delta^\ddagger(\text{HO}^-_{\text{PT}}) - \Delta^\ddagger(\text{HOO}^-_{\text{w}})$ |                           |                           |
|---------------------------|---|---------------------------------------------------------------------------------------------------------------|---------------------------|---------------------------|
|                           |   | $\Delta\Delta E^\ddagger$                                                                                     | $\Delta\Delta H^\ddagger$ | $\Delta\Delta G^\ddagger$ |
| <b>inv-S<sub>N</sub>2</b> | 0 | 0.1                                                                                                           | -0.2                      | -1.5                      |
|                           | 1 | 3.2                                                                                                           | 3.5                       | 4.2                       |
|                           | 2 | 2.1                                                                                                           | 2.1                       | 3.1                       |
|                           | 3 | 4.9                                                                                                           | 5.2                       | 4.6                       |
|                           | 4 | 2.0                                                                                                           | 2.7                       | 4.2                       |
| <b>anti-E2</b>            | 0 | -3.0                                                                                                          | -3.3                      | -4.6                      |
|                           | 1 | 1.4                                                                                                           | 1.4                       | 1.7                       |
|                           | 2 | 0.9                                                                                                           | 0.0                       | -1.8                      |
|                           | 3 | 1.2                                                                                                           | 1.3                       | 0.4                       |
|                           | 4 | 0.4                                                                                                           | -0.2                      | 1.7                       |
| <b>ret-S<sub>N</sub>2</b> | 0 | 4.4                                                                                                           | 4.2                       | 1.9                       |
| <b>syn-E2</b>             | 0 | -2.2                                                                                                          | -2.6                      | -4.5                      |

[a] Computed at CCSD(T)/aug-cc-pVTZ//MP2/6-311++G(d,p).

**Table S4.** Orbital energy (in eV) of the HOMO of  $\text{HOO}^-(\text{H}_2\text{O})_{n=0-4}$  and of  $\text{HO}^-(\text{H}_2\text{O})_{n=0-4}$ <sup>[a]</sup>

| n | $\text{HOO}^-(\text{H}_2\text{O})_n$ |               | $\text{HO}^-(\text{HOOH})(\text{H}_2\text{O})_n$ |               | $\text{HO}^-(\text{H}_2\text{O})_n$ |               |
|---|--------------------------------------|---------------|--------------------------------------------------|---------------|-------------------------------------|---------------|
| 0 | $\text{HOO}^-$                       | 1.67 (-3.11)  |                                                  |               | $\text{HO}^-$                       | 1.36 (-2.87)  |
| 1 | $\text{HOO}^-(\text{H}_2\text{O})$   | [b]           | $\text{HO}^-(\text{HOOH})$                       | -0.99 (-5.40) | $\text{HO}^-(\text{H}_2\text{O})$   | -0.49 (-4.62) |
| 2 | $\text{HOO}^-(\text{H}_2\text{O})_2$ | -0.77 (-5.58) | $\text{HO}^-(\text{HOOH})(\text{H}_2\text{O})$   | -1.66 (-6.49) | $\text{HO}^-(\text{H}_2\text{O})_2$ | -1.37 (-5.69) |
| 3 | $\text{HOO}^-(\text{H}_2\text{O})_3$ | -1.33 (-6.00) | $\text{HO}^-(\text{HOOH})(\text{H}_2\text{O})_2$ | -2.35 (-6.89) | $\text{HO}^-(\text{H}_2\text{O})_3$ | -2.32 (-6.60) |
| 4 | $\text{HOO}^-(\text{H}_2\text{O})_4$ | -1.87 (-6.64) | $\text{HO}^-(\text{HOOH})(\text{H}_2\text{O})_3$ | -2.78 (-7.28) | $\text{HO}^-(\text{H}_2\text{O})_4$ | -2.89 (-7.23) |

[a] Values in normal text are computed at B97-1/6-311++G(d,p); values in parentheses are computed at HF/6-311++G(d,p)//MP2/6-311++G(d,p). [b] Spontaneous formation of  $\text{HO}^-(\text{HOOH})$ .

**Table S5.** Proton affinities (PA) and ethyl cation affinities (ECA) of anions.<sup>[a]</sup>

| n                                                                                                         | HOO <sup>-</sup> (H <sub>2</sub> O) <sub>n</sub> |                      | HO <sup>-</sup> (HOOH)(H <sub>2</sub> O) <sub>n</sub> |       | HO <sup>-</sup> (H <sub>2</sub> O) <sub>n</sub>       |
|-----------------------------------------------------------------------------------------------------------|--------------------------------------------------|----------------------|-------------------------------------------------------|-------|-------------------------------------------------------|
| PA (Nu <sup>-</sup> + H <sup>+</sup> → NuH)                                                               |                                                  |                      |                                                       |       |                                                       |
| 0                                                                                                         | HOO <sup>-</sup>                                 | 375.9                |                                                       |       | HO <sup>-</sup> 390.0                                 |
| 1                                                                                                         | HO <sup>-</sup> (HOOH)                           | 356.7                | HO <sup>-</sup> (HOOH)                                | 356.7 | HO <sup>-</sup> (H <sub>2</sub> O) 367.4              |
| 2                                                                                                         | HOO <sup>-</sup> (H <sub>2</sub> O) <sub>2</sub> | 348.6                | HO <sup>-</sup> (HOOH)(H <sub>2</sub> O)              | 347.6 | HO <sup>-</sup> (H <sub>2</sub> O) <sub>2</sub> 357.0 |
| 3                                                                                                         | HOO <sup>-</sup> (H <sub>2</sub> O) <sub>3</sub> | 340.9                | HO <sup>-</sup> (HOOH)(H <sub>2</sub> O) <sub>2</sub> | 340.2 | HO <sup>-</sup> (H <sub>2</sub> O) <sub>3</sub> 355.3 |
| 4                                                                                                         | HOO <sup>-</sup> (H <sub>2</sub> O) <sub>4</sub> | 333.6                | HO <sup>-</sup> (HOOH)(H <sub>2</sub> O) <sub>3</sub> | 333.0 | HO <sup>-</sup> (H <sub>2</sub> O) <sub>4</sub> 349.2 |
| ECA (Nu <sup>-</sup> + CH <sub>3</sub> CH <sub>2</sub> <sup>+</sup> → CH <sub>3</sub> CH <sub>2</sub> Nu) |                                                  |                      |                                                       |       |                                                       |
| 0                                                                                                         | HOO <sup>-</sup>                                 | 233.6                |                                                       |       | HO <sup>-</sup> 239.6                                 |
| 1                                                                                                         | HO <sup>-</sup> (HOOH)                           | 214.9 <sup>[b]</sup> | HO <sup>-</sup> (HOOH)                                | 207.6 | HO <sup>-</sup> (H <sub>2</sub> O) 218.1              |
| 2                                                                                                         | HOO <sup>-</sup> (H <sub>2</sub> O) <sub>2</sub> | 207.3                | HO <sup>-</sup> (HOOH)(H <sub>2</sub> O)              | 198.3 | HO <sup>-</sup> (H <sub>2</sub> O) <sub>2</sub> 207.6 |
| 3                                                                                                         | HOO <sup>-</sup> (H <sub>2</sub> O) <sub>3</sub> | 198.0                | HO <sup>-</sup> (HOOH)(H <sub>2</sub> O) <sub>2</sub> | 190.6 | HO <sup>-</sup> (H <sub>2</sub> O) <sub>3</sub> 198.0 |
| 4                                                                                                         | HOO <sup>-</sup> (H <sub>2</sub> O) <sub>4</sub> | 192.6                | HO <sup>-</sup> (HOOH)(H <sub>2</sub> O) <sub>3</sub> | 184.5 | HO <sup>-</sup> (H <sub>2</sub> O) <sub>4</sub> 192.8 |

[a] Computed at using G3(MP2).

[b] Formation of CH<sub>3</sub>CH<sub>2</sub>OOH(H<sub>2</sub>O)



**Table S6.** Distortion index (%D<sup>‡</sup>) of transition states.<sup>[a,b]</sup>

| <b>HOO<sup>-</sup>-w-path</b> |                                 |                                  |                 | <b>HO<sup>-</sup>-PT-path</b>   |                                  |                 |
|-------------------------------|---------------------------------|----------------------------------|-----------------|---------------------------------|----------------------------------|-----------------|
| <b>inv-S<sub>N</sub>2-TS</b>  |                                 |                                  |                 | <b>anti-E2-TS</b>               |                                  |                 |
| n                             | %C <sup>α</sup> Cl <sup>‡</sup> | %H <sup>β</sup> C <sup>β</sup> ‡ | %D <sup>‡</sup> | %C <sup>α</sup> Cl <sup>‡</sup> | %H <sup>β</sup> C <sup>β</sup> ‡ | %D <sup>‡</sup> |
| 0                             | 18.2                            | -0.1                             | 18.1            | 20.3                            | -0.3                             | 20.0            |
| 1                             | 21.8                            | -0.1                             | 21.7            | 25.9                            | -0.3                             | 25.6            |
| 2                             | 23.3                            | -0.1                             | 23.3            | 26.8                            | -0.3                             | 26.5            |
| 3                             | 25.8                            | 0.0                              | 25.8            | 28.0                            | -0.3                             | 27.7            |
| 4                             | 27.0                            | -0.1                             | 27.0            | 26.9                            | -0.3                             | 26.7            |
| <b>anti-E2-TS</b>             |                                 |                                  |                 | <b>anti-E2-TS</b>               |                                  |                 |
| n                             | %C <sup>α</sup> Cl <sup>‡</sup> | %H <sup>β</sup> C <sup>β</sup> ‡ | %D <sup>‡</sup> | %C <sup>α</sup> Cl <sup>‡</sup> | %H <sup>β</sup> C <sup>β</sup> ‡ | %D <sup>‡</sup> |
| 0                             | 9.1                             | 25.8                             | 34.9            | 6.9                             | 21.5                             | 28.5            |
| 1                             | 14.4                            | 33.7                             | 48.1            | 13.7                            | 37.7                             | 51.4            |
| 2                             | 12.4                            | 44.5                             | 56.9            | 14.8                            | 40.0                             | 54.7            |
| 3                             | 20.2                            | 38.7                             | 58.9            | 16.2                            | 41.7                             | 57.9            |
| 4                             | 21.0                            | 41.2                             | 62.2            | 14.9                            | 37.0                             | 51.9            |

[a] Computed at MP2/6-311++(d,p).

[b] Definitions:

$$\%D^{\ddagger} = \%C^{\alpha}Cl^{\ddagger} + \%H^{\beta}C^{\beta\ddagger}$$

$$\%C^{\alpha}Cl^{\ddagger} = 100 \times (r_{C^{\alpha}-Cl}^{\ddagger} - r_{C^{\alpha}-Cl}^{\text{Reactant}}) / r_{C^{\alpha}-Cl}^{\text{Reactant}}$$

$$\%H^{\beta}C^{\beta\ddagger} = 100 \times (r_{H^{\beta}-C^{\beta}}^{\ddagger} - r_{H^{\beta}-C^{\beta}}^{\text{Reactant}}) / r_{H^{\beta}-C^{\beta}}^{\text{Reactant}}$$

**Table S7.** NPA atom charges  $q$  (in a.u.) for transition states of  $\text{HOO}^-(\text{H}_2\text{O})_n + \text{CH}_3\text{CH}_2\text{Cl}$  reactions.<sup>[a]</sup>

| <b>HOO<sup>-</sup><sub>w</sub>-path</b> |               |                      |                |                                      |                                | <b>HO<sup>-</sup><sub>PT</sub>-path</b> |                      |                |                                      |                                |
|-----------------------------------------|---------------|----------------------|----------------|--------------------------------------|--------------------------------|-----------------------------------------|----------------------|----------------|--------------------------------------|--------------------------------|
| <b>inv-S<sub>N</sub>2-TS</b>            |               |                      |                |                                      |                                | <b>inv-S<sub>N</sub>2-TS</b>            |                      |                |                                      |                                |
| n                                       | $q(\text{O})$ | $q(\text{C}^\alpha)$ | $q(\text{Cl})$ | $q(\text{CH}_3\text{CH}_2\text{Cl})$ | $\Delta q(\text{Cl}-\text{O})$ | $q(\text{O})$                           | $q(\text{C}^\alpha)$ | $q(\text{Cl})$ | $q(\text{CH}_3\text{CH}_2\text{Cl})$ | $\Delta q(\text{Cl}-\text{O})$ |
| 0                                       | -0.656        | 0.012                | -0.539         | -0.142                               | 0.117                          | -1.224                                  | 0.044                | -0.580         | -0.161                               | 0.644                          |
| 1                                       | -0.636        | 0.056                | -0.598         | -0.159                               | 0.038                          | -1.176                                  | 0.105                | -0.663         | -0.187                               | 0.513                          |
| 2                                       | -0.618        | 0.065                | -0.618         | -0.172                               | 0.000                          | -1.150                                  | 0.104                | -0.672         | -0.194                               | 0.478                          |
| 3                                       | -0.651        | 0.091                | -0.658         | -0.178                               | -0.007                         | -1.138                                  | 0.111                | -0.689         | -0.202                               | 0.449                          |
| 4                                       | -0.650        | 0.100                | -0.675         | -0.186                               | -0.025                         | -1.144                                  | 0.095                | -0.667         | -0.183                               | 0.478                          |
| <b>anti-E2-TS</b>                       |               |                      |                |                                      |                                | <b>anti-E2-TS</b>                       |                      |                |                                      |                                |
| n                                       | $q(\text{O})$ | $q(\text{H}^\beta)$  | $q(\text{Cl})$ | $q(\text{CH}_3\text{CH}_2\text{Cl})$ | $\Delta q(\text{Cl}-\text{O})$ | $q(\text{O})$                           | $q(\text{H}^\beta)$  | $q(\text{Cl})$ | $q(\text{CH}_3\text{CH}_2\text{Cl})$ | $\Delta q(\text{Cl}-\text{O})$ |
| 0                                       | -0.617        | 0.417                | -0.355         | -0.221                               | 0.262                          | -1.190                                  | 0.409                | -0.313         | -0.199                               | 0.877                          |
| 1                                       | -0.608        | 0.451                | -0.458         | -0.254                               | 0.150                          | -1.132                                  | 0.467                | -0.447         | -0.267                               | 0.685                          |
| 2                                       | -0.613        | 0.472                | -0.422         | -0.292                               | 0.192                          | -1.119                                  | 0.471                | -0.465         | -0.276                               | 0.654                          |
| 3                                       | -0.659        | 0.480                | -0.564         | -0.268                               | 0.096                          | -1.112                                  | 0.474                | -0.492         | -0.283                               | 0.620                          |
| 4                                       | -0.643        | 0.481                | -0.580         | -0.284                               | 0.063                          | -1.133                                  | 0.462                | -0.466         | -0.255                               | 0.666                          |

[a] Computed at MP2/6-311++G(d,p).

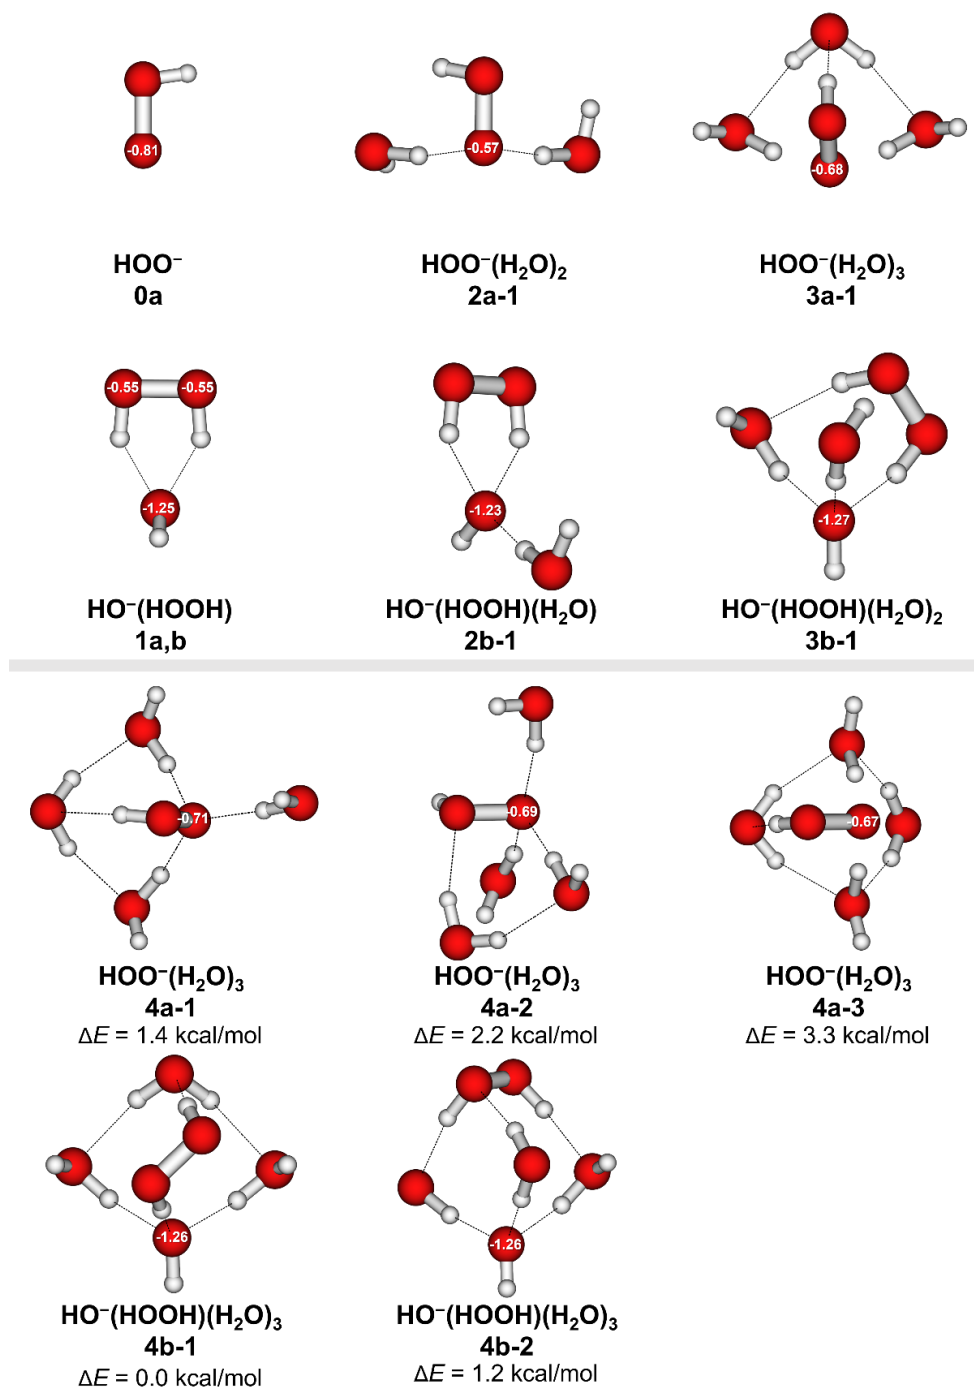

**Figure S1.** Structures and relative energies  $\Delta E$  (in kcal/mol) of  $\text{HOO}^-(\text{H}_2\text{O})_{0-4}$  cluster. Energies  $\Delta E$  for the **4a** and **4b** series relative to **4b-1**, computed at CCSD(T)/aug-cc-pVTZ//MP2/6-311++G(d,p) (without ZPE). The numbers represent the NPA charges (in a.u.) on the attacking O-atom.

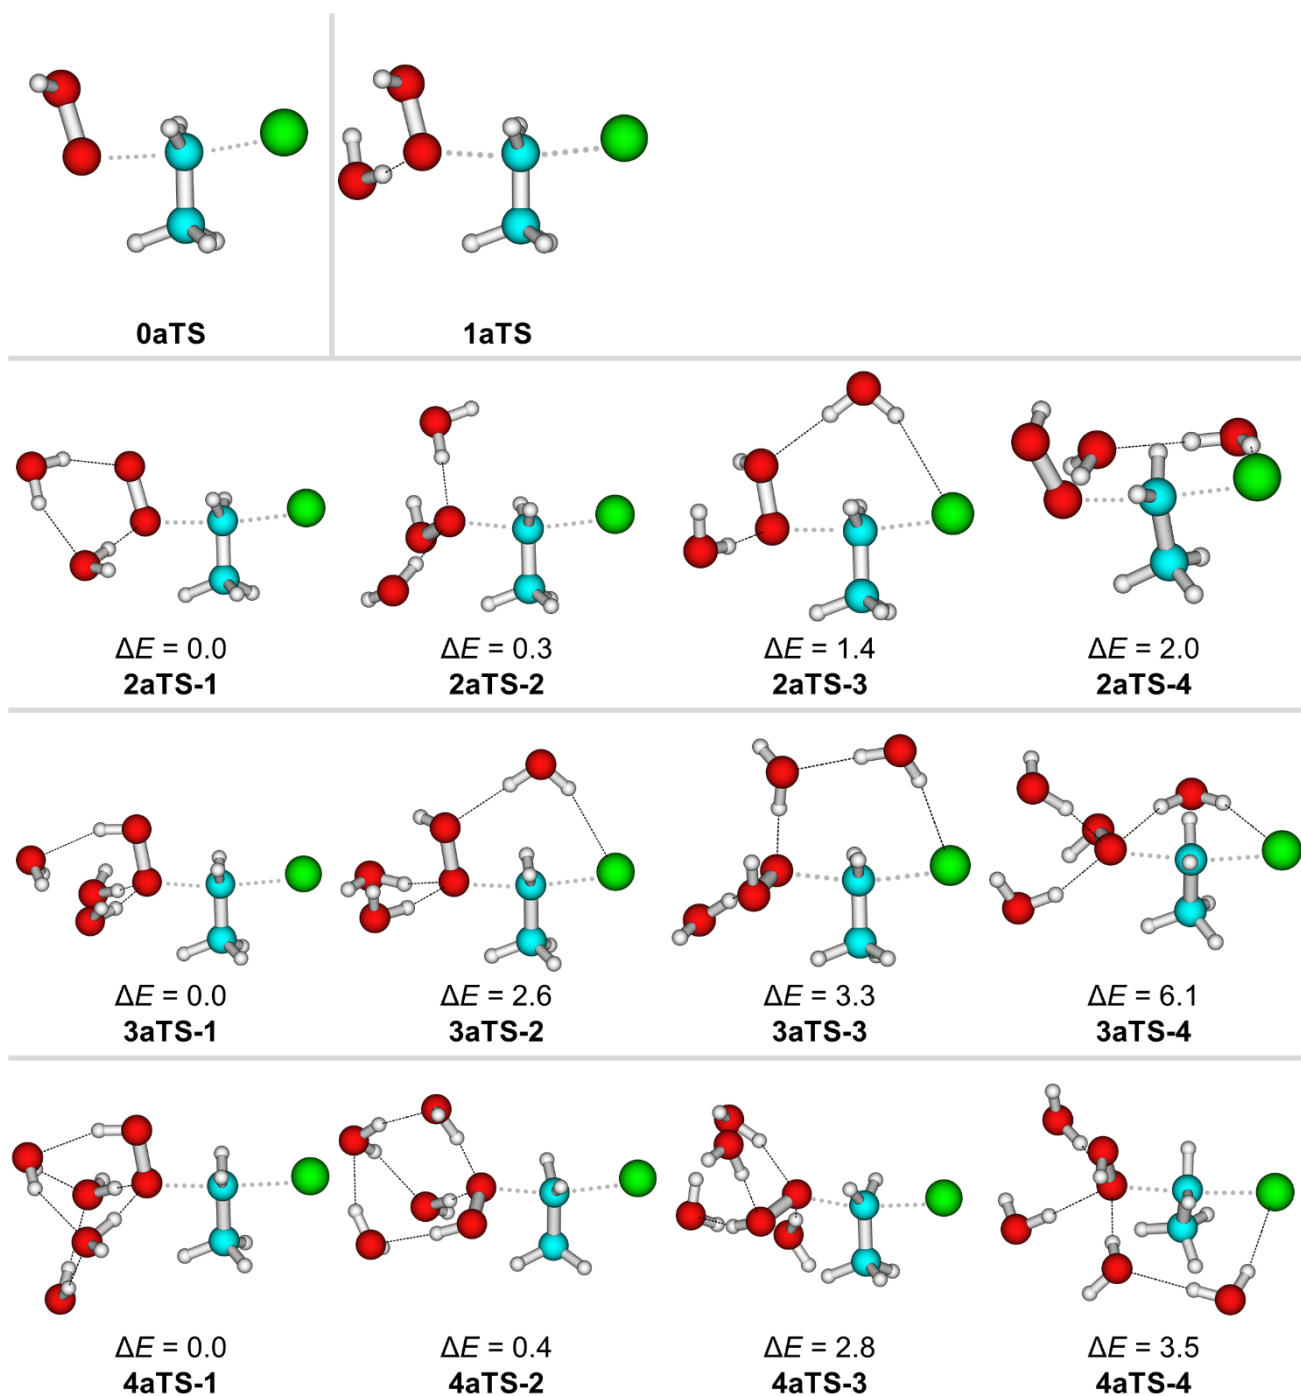

**Figure S2.** Structures and relative energies  $\Delta E$  (in kcal/mol) of various transition states of the  $\text{HOO}^-$ - $\text{S}_{\text{N}}2$  path of  $\text{HOO}^-(\text{H}_2\text{O})_{0-4} + \text{CH}_3\text{CH}_2\text{Cl}$ . Energies  $\Delta E$  are relative to **2aTS-1**, **3aTS-1**, or **4aTS-1**, respectively, and have been computed at MP2/6-311++G(d,p) (without ZPE).

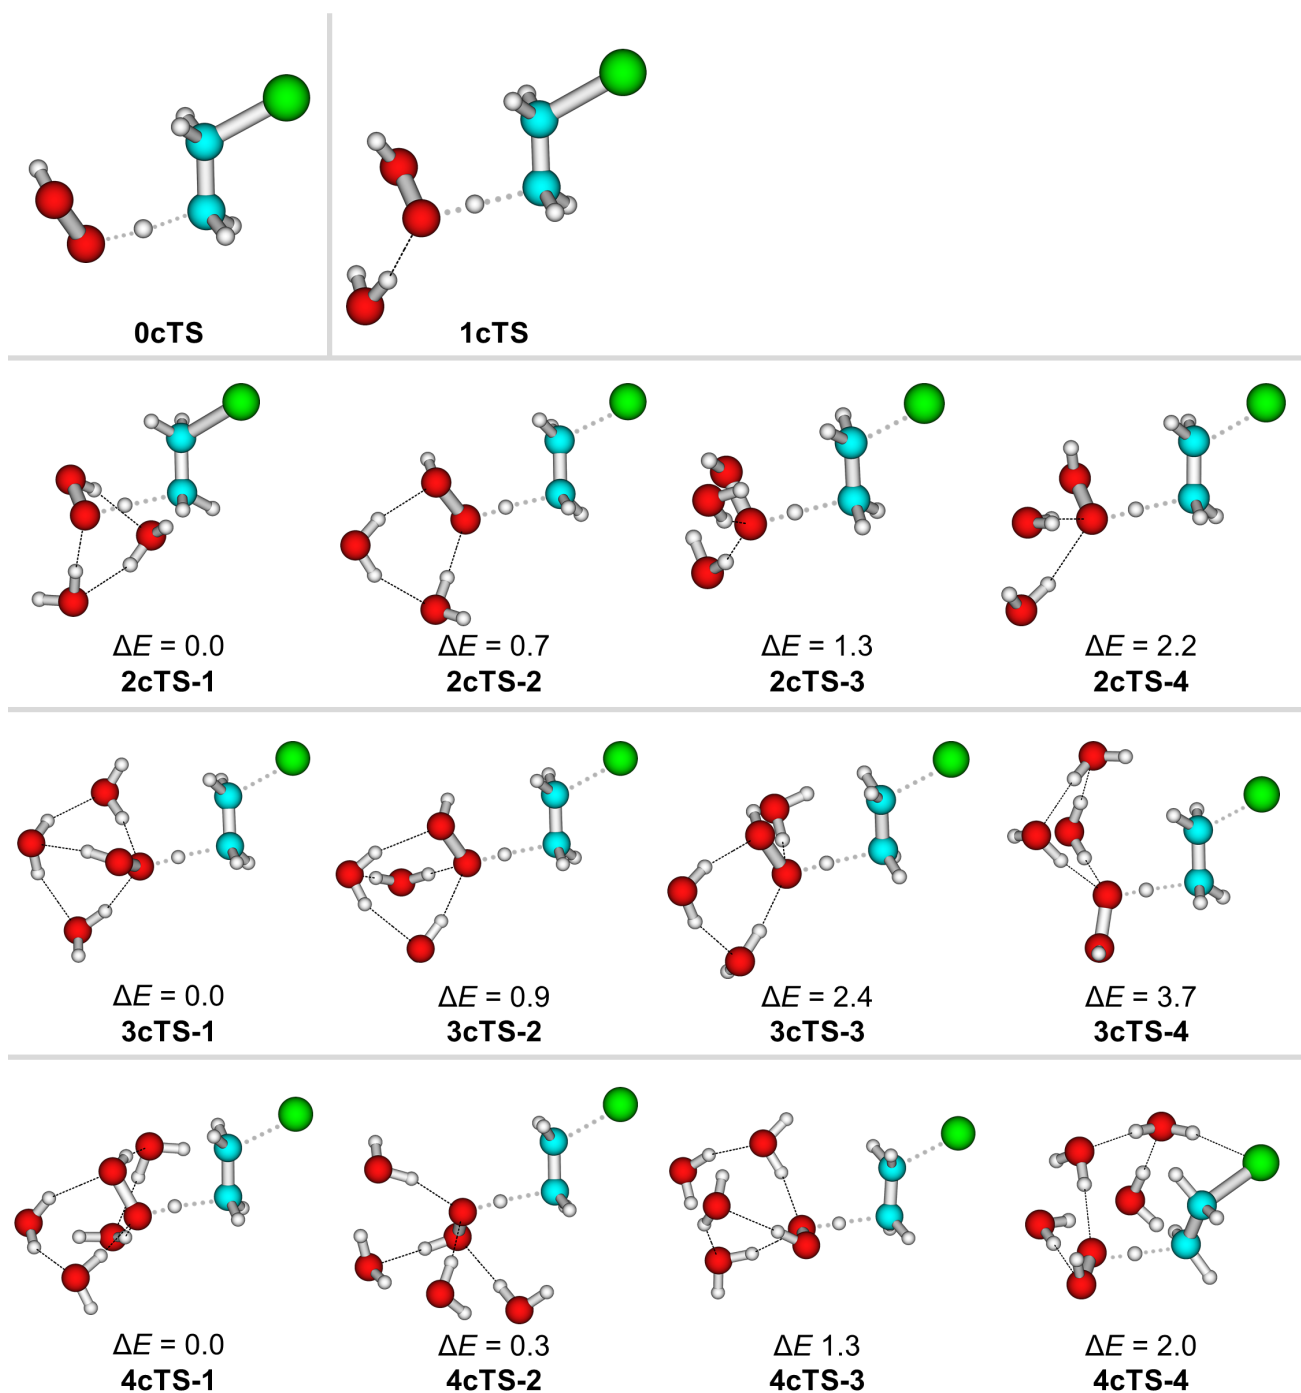

**Figure S3.** Structures and relative energies  $\Delta E$  (in kcal/mol) of various transition states of the  $\text{HOO}^-$ -E2 path of  $\text{HOO}^-(\text{H}_2\text{O})_{0-4} + \text{CH}_3\text{CH}_2\text{Cl}$ . Energies  $\Delta E$  are relative to **2cTS-1**, **3cTS-1**, or **4cTS-1**, respectively, and have been computed at MP2/6-311++G(d,p) (without ZPE).

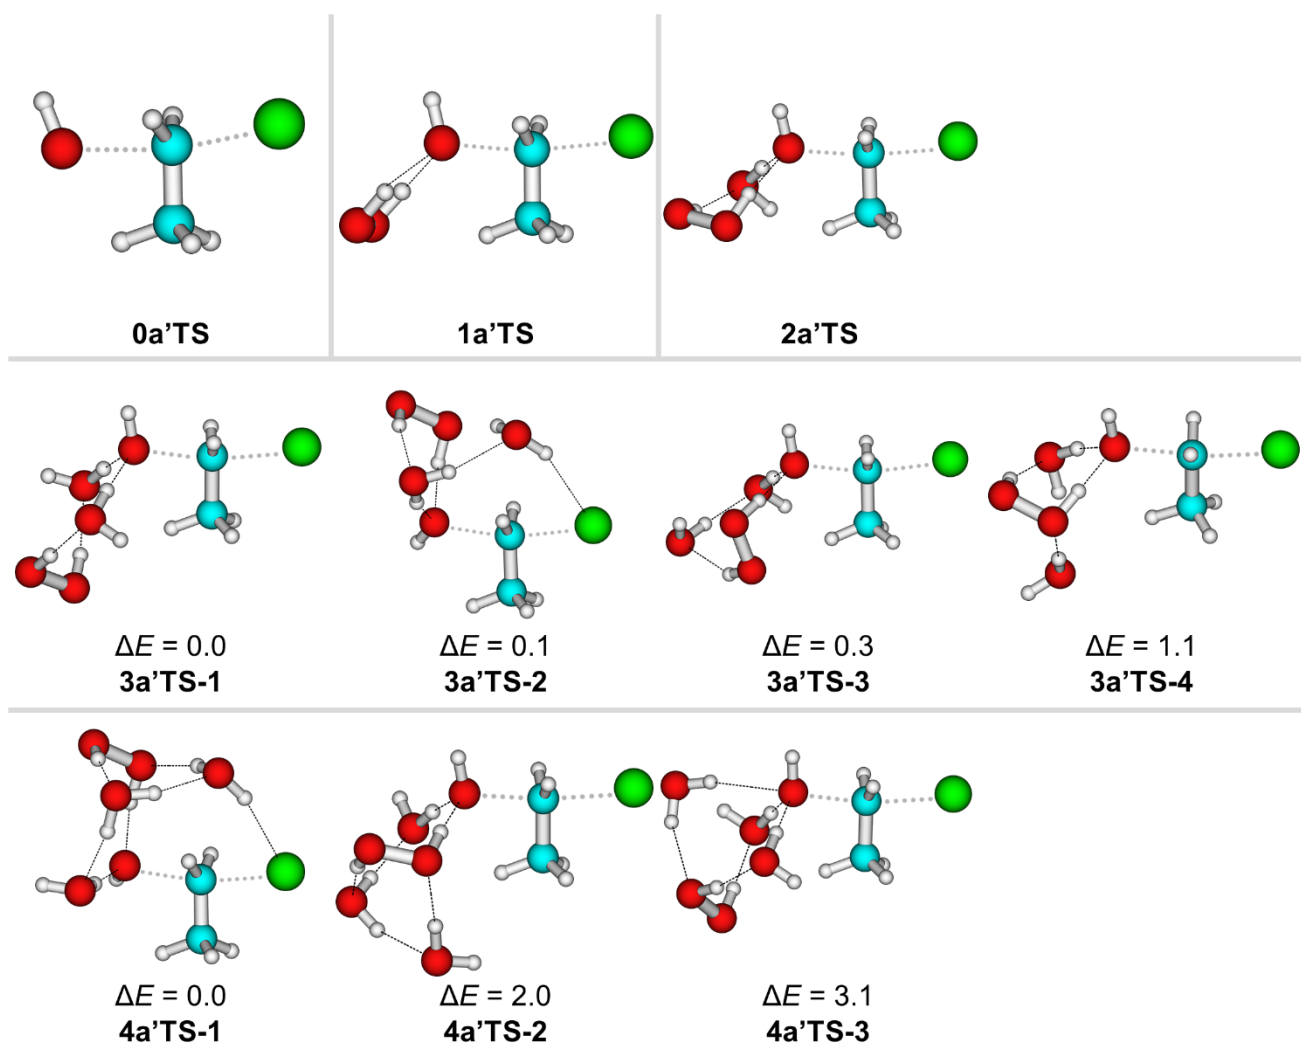

**Figure S4.** Structures and relative energies  $\Delta E$  (in kcal/mol) of various transition states of the  $\text{HO}^-_{\text{PT-SN2}}$  path of  $\text{HO}^-(\text{H}_2\text{O})_{0-4} + \text{CH}_3\text{CH}_2\text{Cl}$ . Energies  $\Delta E$  are relative to **3a'TS-1** or **4a'TS-1** and have been computed at MP2/6-311++G(d,p) (without ZPE).

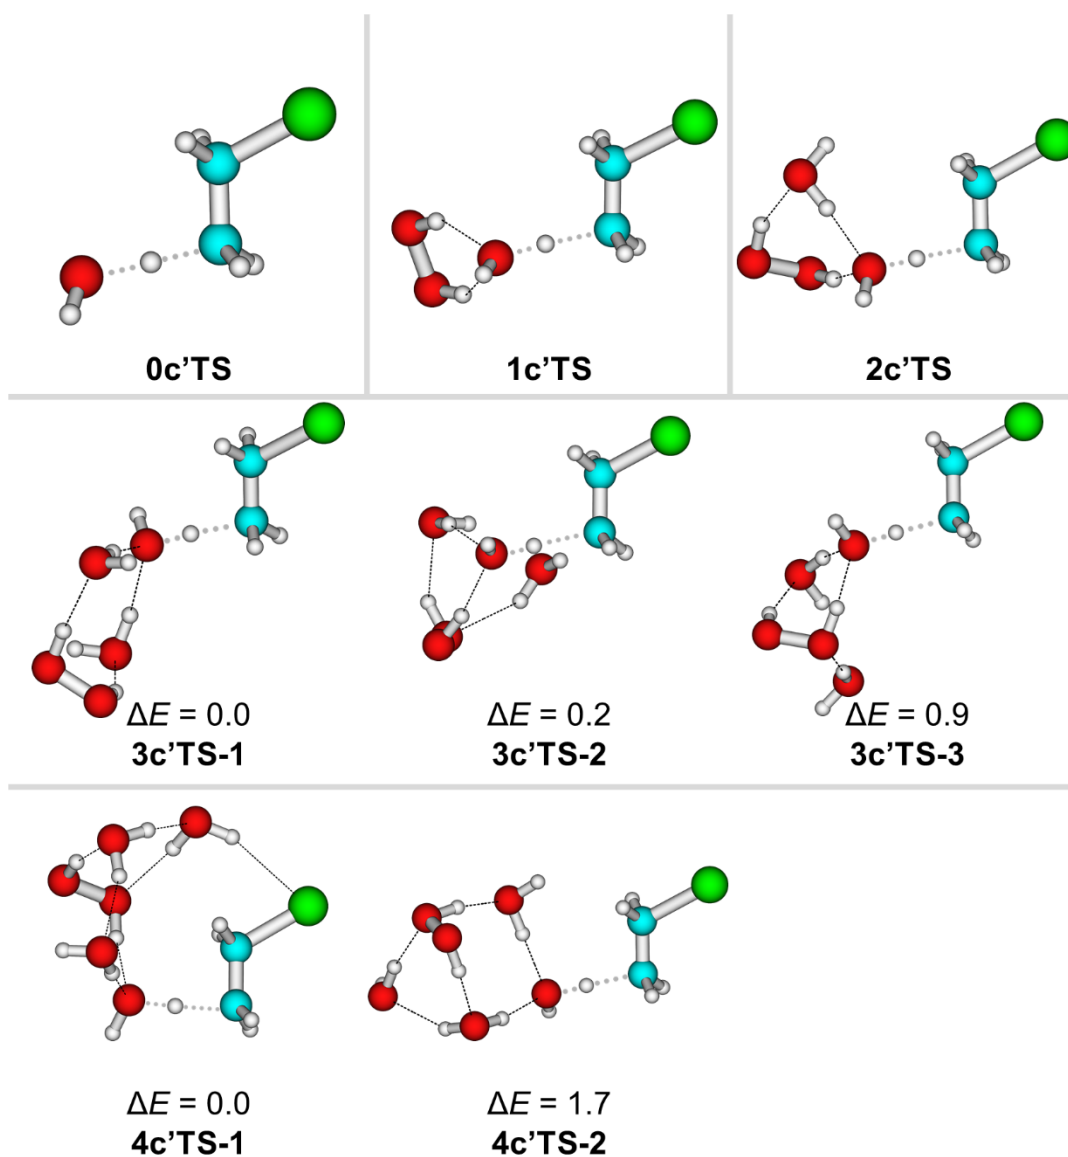

**Figure S5.** Structures and relative energies  $\Delta E$  (in kcal/mol) of various transition states of the  $\text{HO}^-_{\text{PT-E2}}$  path of  $\text{HO}^-(\text{H}_2\text{O})_{0-4} + \text{CH}_3\text{CH}_2\text{Cl}$ . Energies  $\Delta E$  are relative to  $3\text{c}'\text{TS-1}$  or  $4\text{c}'\text{TS-1}$  and have been computed at MP2/6-311++G(d,p) (without ZPE).

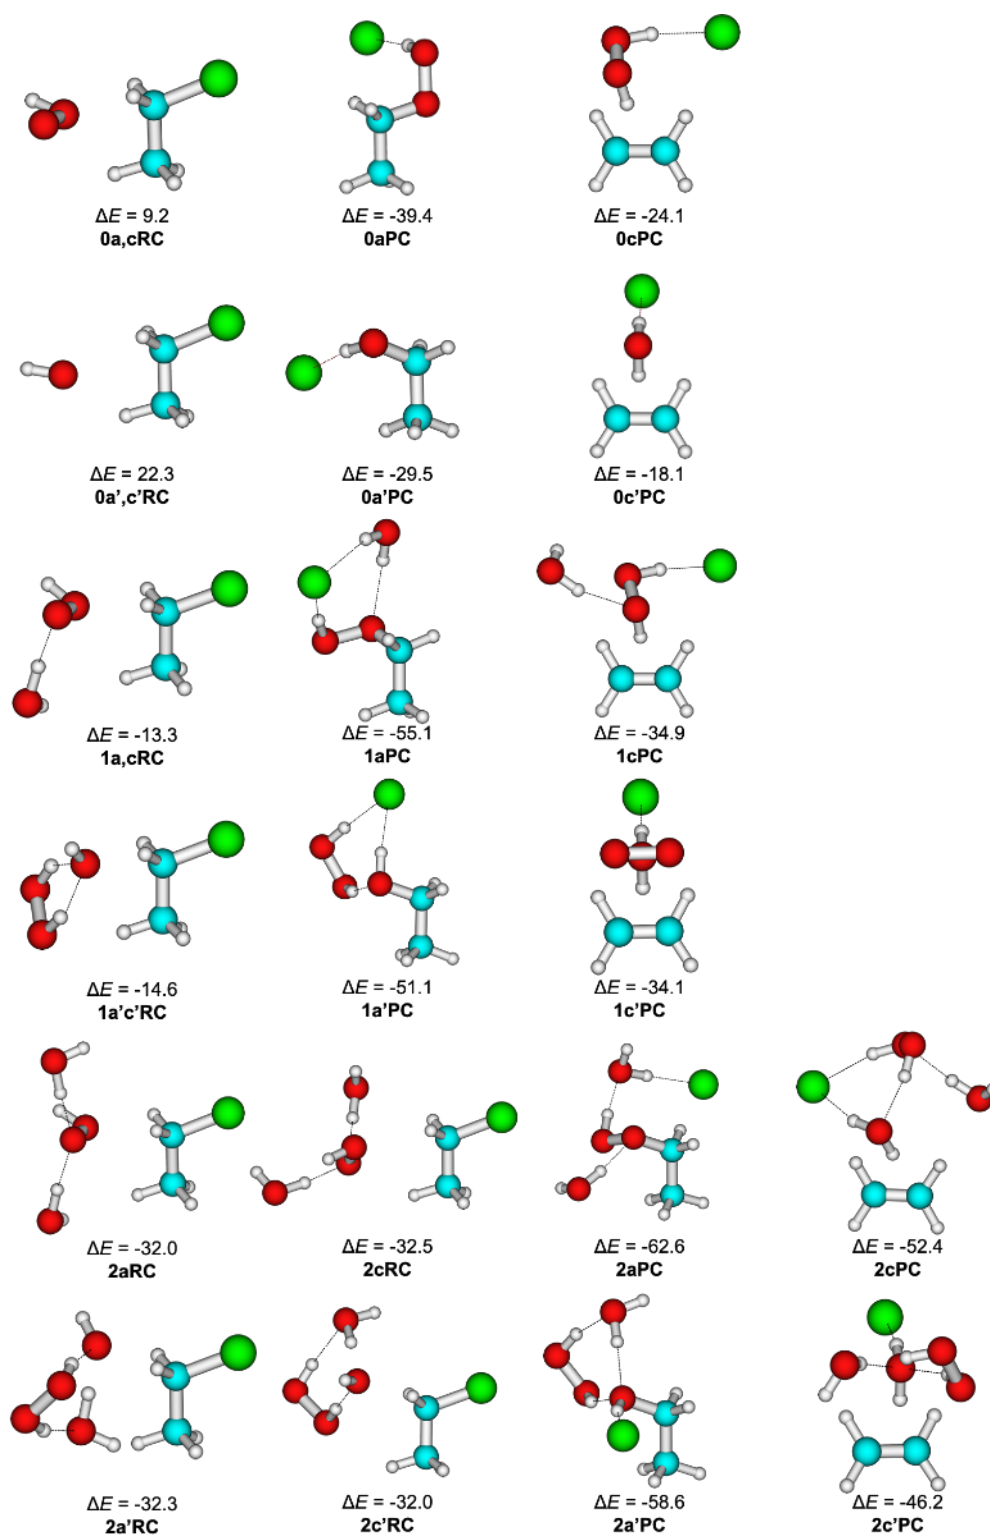

**Figure S6.** Structures and relative energies  $\Delta E$  (in kcal/mol) of reactant complexes (RC) and product complexes (PC). Energies  $\Delta E$  are relative to  $\text{HO}^-(\text{HOOH}) + \text{CH}_3\text{CH}_2\text{Cl}$ , computed at CCSD(T)/aug-cc-pVTZ//MP2/6-311++G(d,p) (without ZPE).



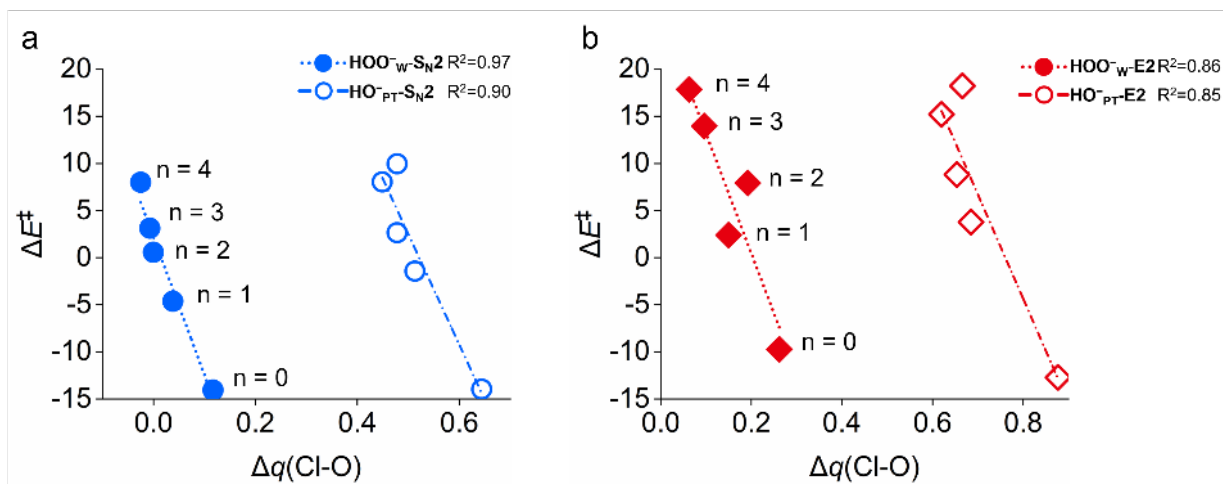

**Figure S7.** Correlation of  $\text{S}_{\text{N}}2$  (a) and  $\text{E}2$  (b) reaction barrier heights  $\Delta E^\ddagger$  (in kcal/mol) with charge asymmetry  $\Delta q(\text{Cl-O}) = q(\text{Cl}) - q(\text{O})$  (in a.u.) for the  $\text{HOO}^-(\text{H}_2\text{O})_{n=0-4} + \text{CH}_3\text{CH}_2\text{Cl}$  reaction, computed at CCSD(T)/aug-cc-pVTZ//MP2/6-311++G(d,p) (without ZPE). Note: for the  $\text{HO}^-_{\text{PT}}$ -pathway,  $n = 0$  corresponds to the  $\text{HO}^- + \text{CH}_3\text{CH}_2\text{Cl}$  reaction.

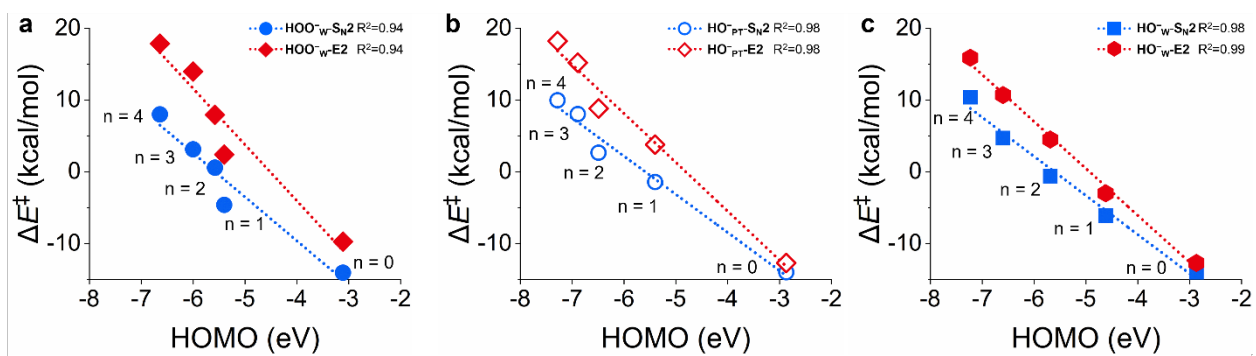

**Figure S8.** The correlation between (a)  $\text{HOO}^-(\text{H}_2\text{O})_{n=0-4} + \text{CH}_3\text{CH}_2\text{Cl}$ , (b)  $\text{HO}^-(\text{HOOH})(\text{H}_2\text{O})_{n=0-3} + \text{CH}_3\text{CH}_2\text{Cl}$ , (c)  $\text{HO}^-(\text{H}_2\text{O})_{n=0-4} + \text{CH}_3\text{CH}_2\text{Cl}$  reaction barrier height  $\Delta E^\ddagger$  (in kcal/mol) and HOMO energy level (in eV) of nucleophiles, computed at CCSD(T)/aug-cc-pVTZ//MP2/6-311++G(d,p) (without ZPE). Note: for the  $\text{HO}^-_{\text{PT}}$ -pathway,  $n = 0$  corresponds to the  $\text{HO}^- + \text{CH}_3\text{CH}_2\text{Cl}$  reaction.

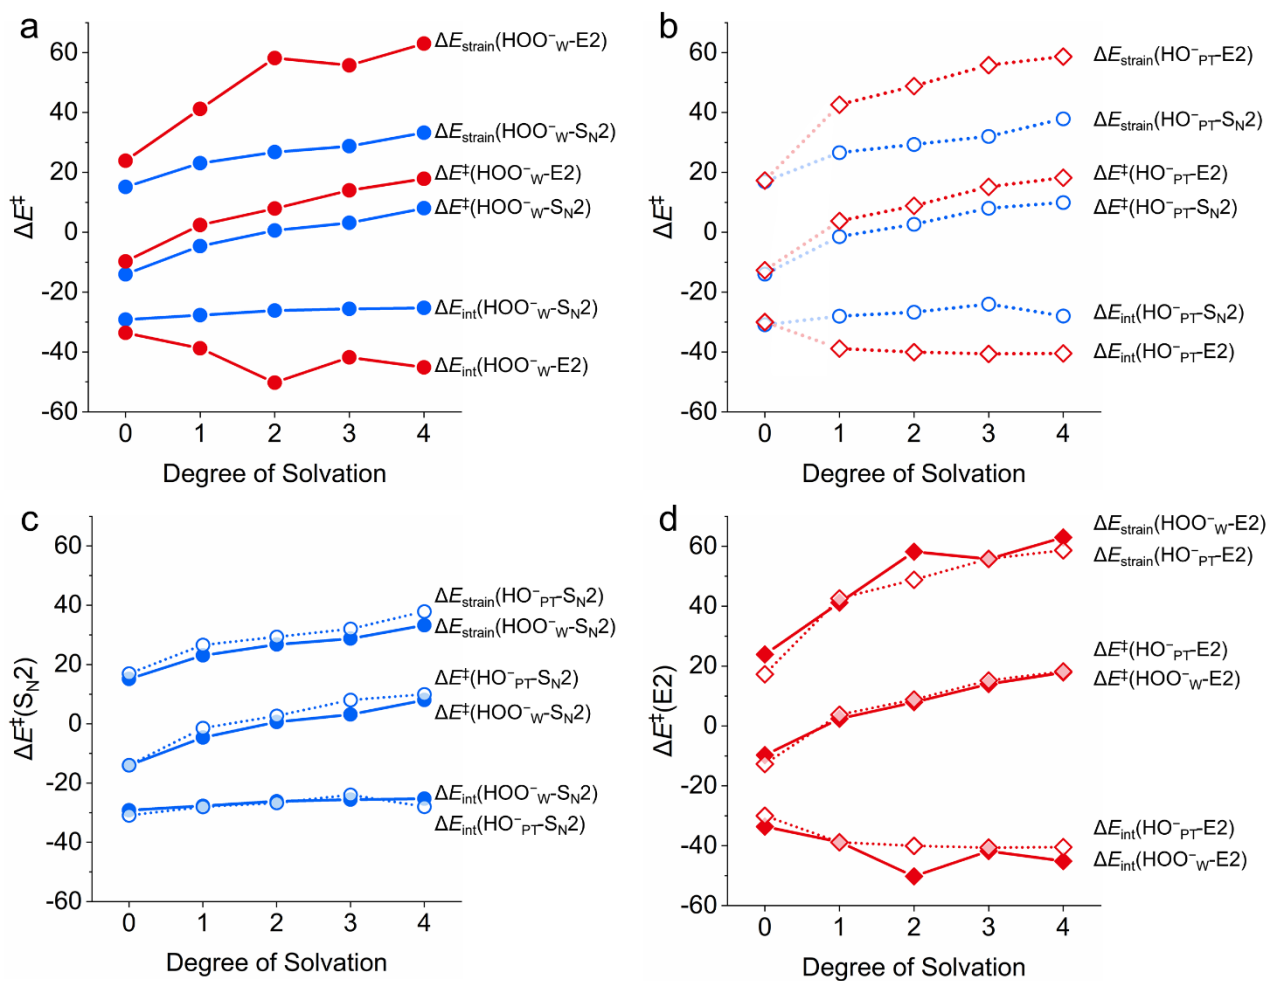

**Figure S9.** Activation strain analysis (in kcal/mol) of transition states for  $\text{HOO}^-(\text{H}_2\text{O})_{n=0-4} + \text{CH}_3\text{CH}_2\text{Cl}$  reaction, computed at CCSD(T)/aug-cc-pVTZ//MP2/6-311++G(d,p) (without ZPE).

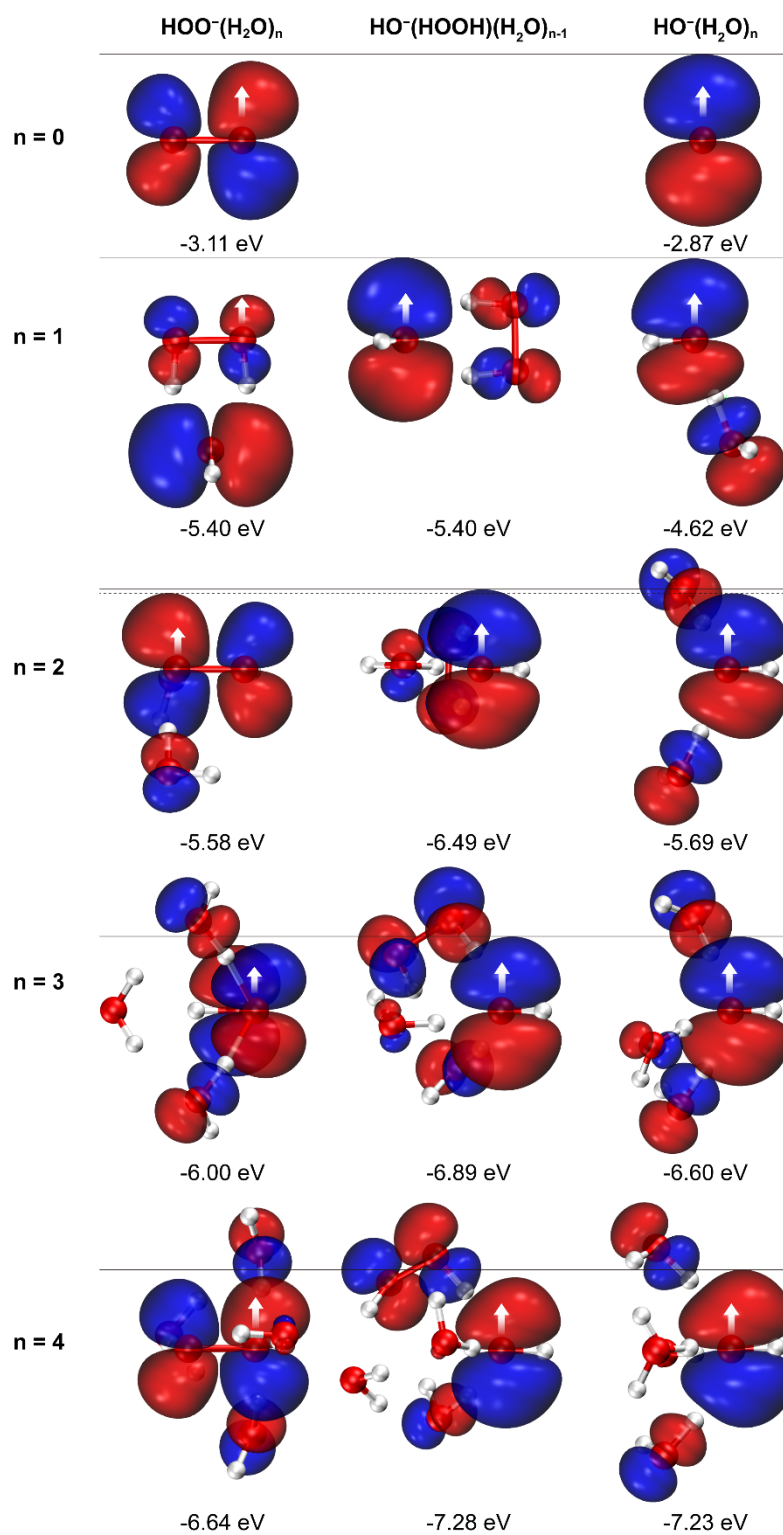

**Figure S10.** Occupied frontier orbitals, computed at MP2/6-311++G(d,p), using Gaussian 16<sup>[1]</sup> and Multiwfn<sup>[2]</sup> (isovalue = 0.03 bohr<sup>-3/2</sup>).

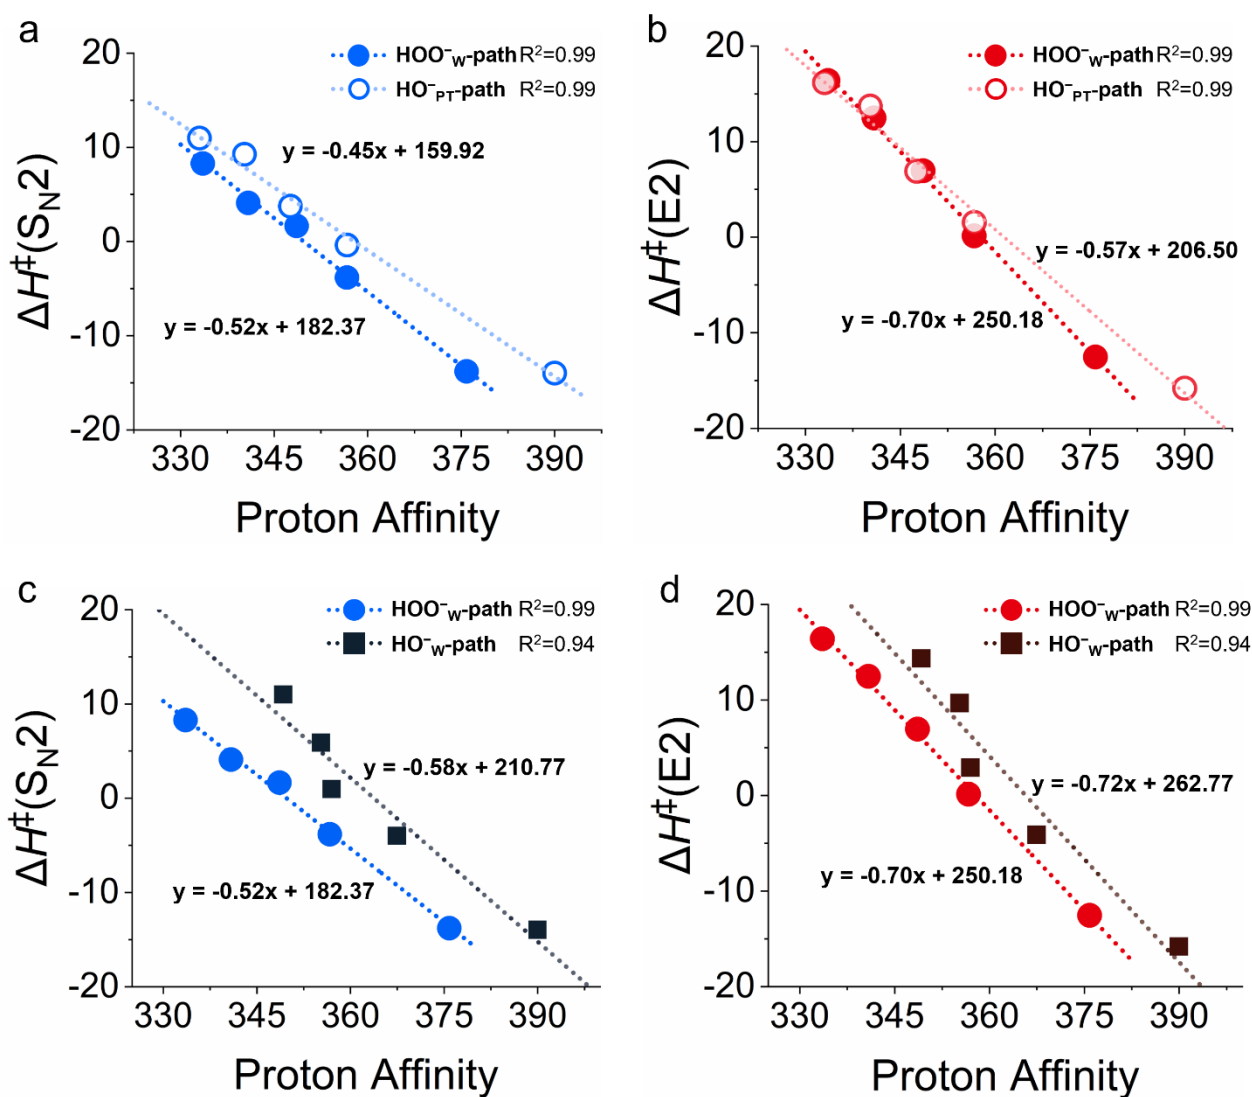

**Figure S11.** Correlation of  $\text{HOO}^-(\text{H}_2\text{O})_{n=0-4} + \text{CH}_3\text{CH}_2\text{Cl}$  reaction barrier height  $\Delta H^\ddagger$  with PA (kcal/mol;  $S_{N2}$  path = blue; E2 path = red), computed at CCSD(T)/aug-cc-pVTZ//MP2/6-311++G(d,p). The data of  $\text{HOO}^-_{\text{w-path}}$  can be found in Table S8.

**Table S8.** Deviation  $\Delta\Delta H^\ddagger$  (in kcal/mol) of reaction barriers  $\Delta H^\ddagger(\text{HO}^- \text{ Brønsted path PA})$  derived from the proton-affinity-based  $\text{HO}^-_{\text{PT}}$  and the  $\text{HO}^-_{\text{W}}$  Brønsted-correlation path from the actual  $\Delta H^\ddagger(\text{HOO}^-)$  values of  $\text{HOO}^-(\text{H}_2\text{O})_{n=0-4} + \text{CH}_3\text{CH}_2\text{Cl}$ .<sup>[a]</sup>

| Path                          | n | $\Delta H^\ddagger(\text{HOO}^-)$ | $\Delta H^\ddagger(\text{HO}^- \text{ Brønsted path PA})$ | $\Delta\Delta H^\ddagger(\text{deviation})$ |
|-------------------------------|---|-----------------------------------|-----------------------------------------------------------|---------------------------------------------|
| $\text{HO}^-_{\text{PT-SN2}}$ | 0 | -13.8                             | -8.0                                                      | 5.8                                         |
|                               | 1 | -3.8                              | 0.5                                                       | 4.3                                         |
|                               | 2 | 1.7                               | 4.1                                                       | 2.4                                         |
|                               | 3 | 4.1                               | 7.6                                                       | 3.5                                         |
|                               | 4 | 8.3                               | 10.8                                                      | 2.5                                         |
| $\text{HO}^-_{\text{PT-E2}}$  | 0 | -12.6                             | -8.3                                                      | 4.3                                         |
|                               | 1 | 0.1                               | 2.7                                                       | 2.6                                         |
|                               | 2 | 6.9                               | 7.3                                                       | 0.4                                         |
|                               | 3 | 12.5                              | 11.7                                                      | -0.8                                        |
|                               | 4 | 16.4                              | 15.9                                                      | -0.5                                        |
| $\text{HO}^-_{\text{W-SN2}}$  | 0 | -13.8                             | -7.0                                                      | 6.8                                         |
|                               | 1 | -3.8                              | 4.1                                                       | 7.9                                         |
|                               | 2 | 1.7                               | 8.8                                                       | 7.1                                         |
|                               | 3 | 4.1                               | 13.2                                                      | 9.1                                         |
|                               | 4 | 8.3                               | 17.5                                                      | 9.2                                         |
| $\text{HO}^-_{\text{W-E2}}$   | 0 | -12.6                             | -7.3                                                      | 5.3                                         |
|                               | 1 | 0.1                               | 6.5                                                       | 6.4                                         |
|                               | 2 | 6.9                               | 12.3                                                      | 5.4                                         |
|                               | 3 | 12.5                              | 17.8                                                      | 5.3                                         |
|                               | 4 | 16.4                              | 23.1                                                      | 6.7                                         |

[a] Computed at CCSD(T)/aug-cc-pVTZ//MP2/6-311++(d,p). Graphical representation in Figure S11.

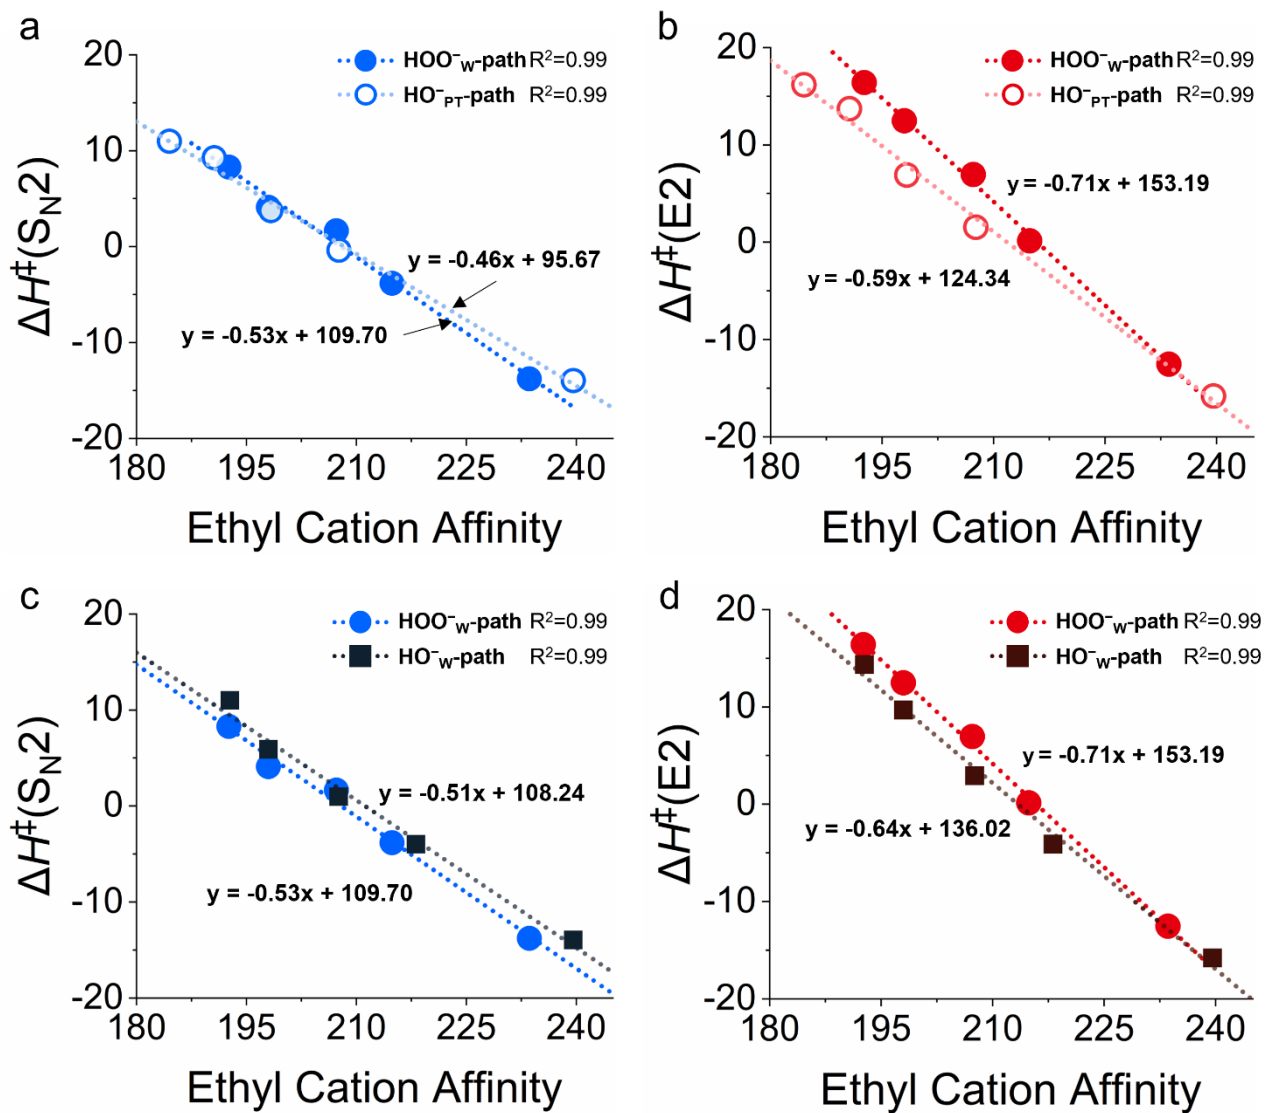

**Figure S12.** Correlation of  $\text{HO}^-(\text{H}_2\text{O})_{n=0-4} + \text{CH}_3\text{CH}_2\text{Cl}$  reaction barrier height  $\Delta H^\ddagger$  with ECA (kcal/mol;  $S_N2$  path = blue; E2 path = red), computed at CCSD(T)/aug-cc-pVTZ//MP2/6-311++G(d,p). The data of  $\text{HOO}^-_{\text{w-path}}$  can be found in Table S9.

**Table S9.** Deviation  $\Delta\Delta H^\ddagger$  (in kcal/mol) of reaction barriers  $\Delta H^\ddagger(\text{HO}^- \text{ Brønsted path ECA})$  derived from the ethyl-cation-affinity-based  $\text{HO}^-_{\text{PT}}$  and the  $\text{HO}^-_{\text{W}}$  Brønsted-correlation path from the actual  $\Delta H^\ddagger(\text{HOO}^-)$  values of  $\text{HOO}^-(\text{H}_2\text{O})_{n=0-4} + \text{CH}_3\text{CH}_2\text{Cl}$ .<sup>[a]</sup>

| Path                          | n | $\Delta H^\ddagger(\text{HOO}^-)$ | $\Delta H^\ddagger(\text{HO}^- \text{ Brønsted path ECA})$ | $\Delta\Delta H^\ddagger(\text{deviation})$ |
|-------------------------------|---|-----------------------------------|------------------------------------------------------------|---------------------------------------------|
| $\text{HO}^-_{\text{PT-SN2}}$ | 0 | -13.8                             | -11.6                                                      | 2.2                                         |
|                               | 1 | -3.8                              | -3.0                                                       | 0.8                                         |
|                               | 2 | 1.7                               | 0.5                                                        | -1.2                                        |
|                               | 3 | 4.1                               | 4.8                                                        | 0.7                                         |
|                               | 4 | 8.3                               | 7.2                                                        | -1.1                                        |
| $\text{HO}^-_{\text{PT-E2}}$  | 0 | -12.6                             | -12.8                                                      | -0.2                                        |
|                               | 1 | 0.1                               | -1.8                                                       | -1.9                                        |
|                               | 2 | 6.9                               | 2.7                                                        | -4.2                                        |
|                               | 3 | 12.5                              | 8.1                                                        | -4.4                                        |
|                               | 4 | 16.4                              | 11.3                                                       | -5.1                                        |
| $\text{HO}^-_{\text{W-SN2}}$  | 0 | -13.8                             | -11.5                                                      | 2.3                                         |
|                               | 1 | -3.8                              | -1.9                                                       | 1.9                                         |
|                               | 2 | 1.7                               | 2.0                                                        | 0.3                                         |
|                               | 3 | 4.1                               | 6.8                                                        | 2.7                                         |
|                               | 4 | 8.3                               | 9.5                                                        | 1.2                                         |
| $\text{HO}^-_{\text{W-E2}}$   | 0 | -12.6                             | -12.9                                                      | -0.3                                        |
|                               | 1 | 0.1                               | -0.9                                                       | -1.0                                        |
|                               | 2 | 6.9                               | 3.9                                                        | -3.0                                        |
|                               | 3 | 12.5                              | 9.8                                                        | -2.7                                        |
|                               | 4 | 16.4                              | 13.3                                                       | -3.1                                        |

[a] Computed at CCSD(T)/aug-cc-pVTZ//MP2/6-311++(d,p). Graphical representation in Figure S12.



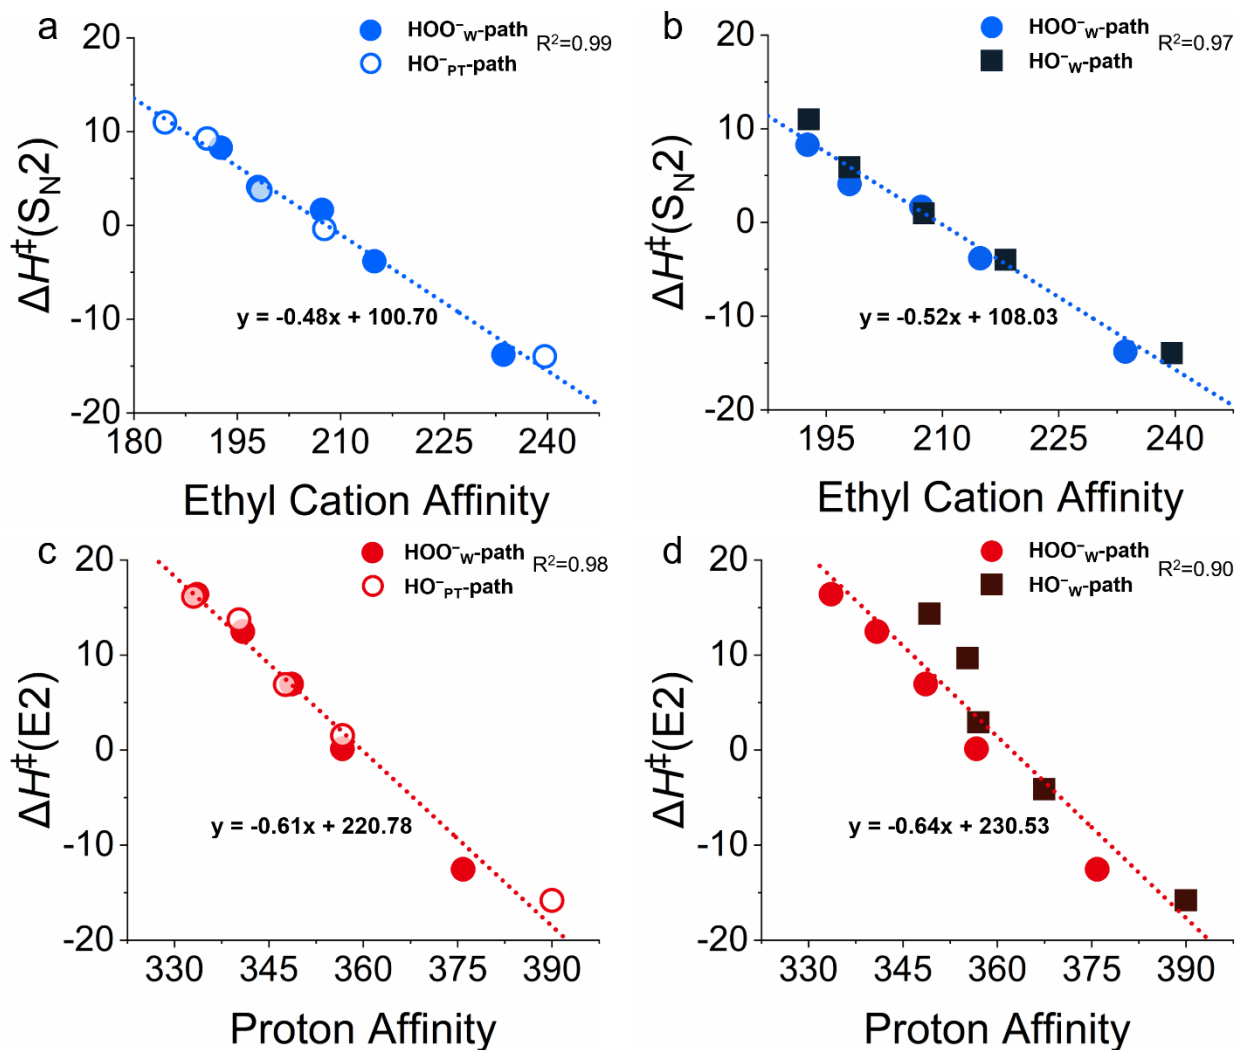

**Figure S13.** Correlation of  $\text{HOO}^-(\text{H}_2\text{O})_{n=0-4} + \text{CH}_3\text{CH}_2\text{Cl}$  reaction barrier height  $\Delta H^\ddagger$  with PA or ECA (in kcal/mol;  $S_N2$  path = blue; E2 path = red), computed at CCSD(T)/aug-cc-pVTZ//MP2/6-311++G(d,p).

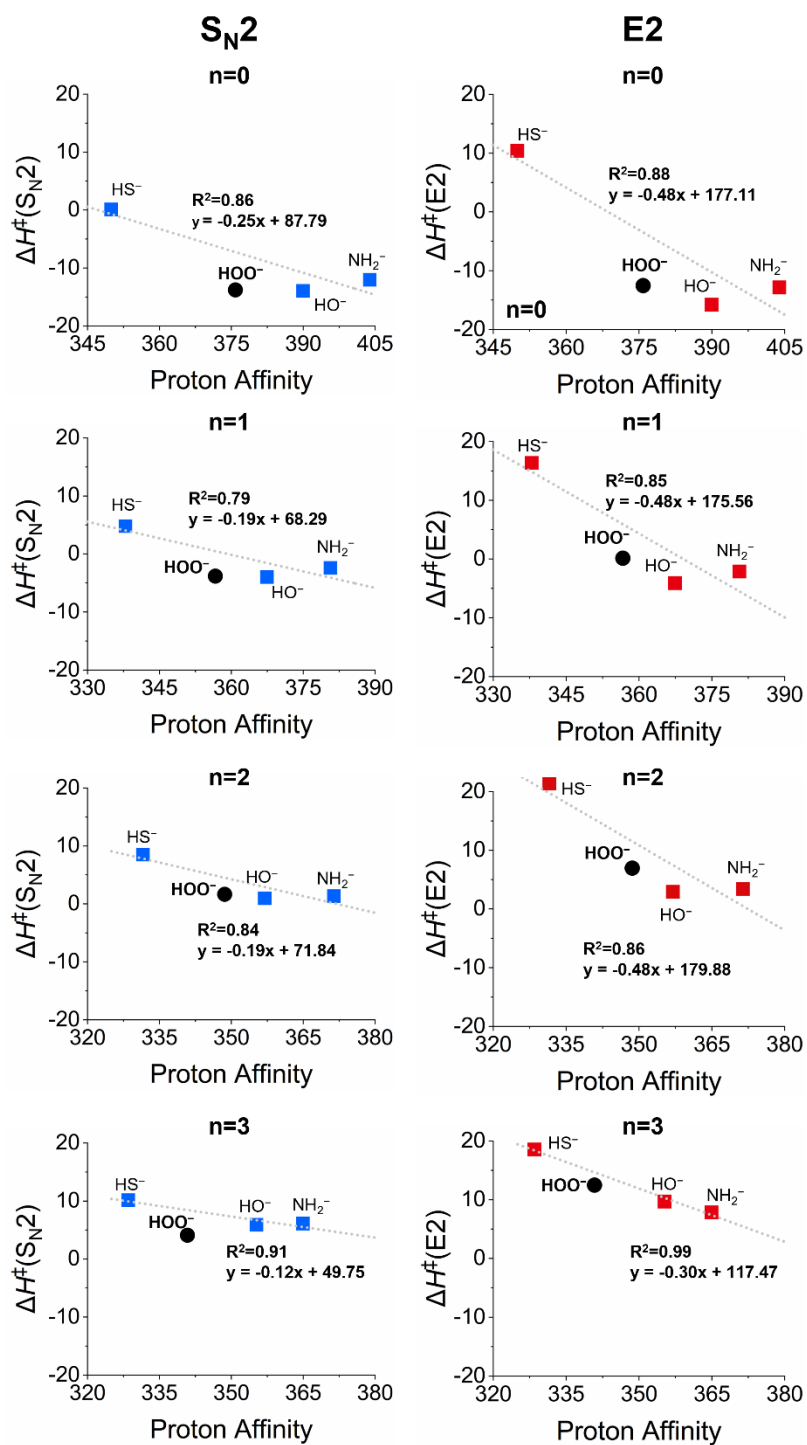

**Figure S14.** Correlation of  $\text{HY}^-(\text{H}_2\text{O})_n$  ( $\text{Y} = \text{O}, \text{S}, \text{HN}$ ) +  $\text{CH}_3\text{CH}_2\text{Cl}$  reaction barrier height  $\Delta H^\ddagger$  with PA (in kcal/mol;  $\text{S}_\text{N}2$  path = blue; E2 path = red), computed at CCSD(T)/aug-cc-pVTZ//MP2/6-311++G(d,p). The data of the  $\text{HOO}^-$ -w-path can be found in Table S10.

**Table S10.** Deviation  $\Delta\Delta H^\ddagger$  (in kcal/mol) of reaction barriers  $\Delta H^\ddagger$ (HY<sup>-</sup> Brønsted path PA) derived from the proton-affinity-based HY<sup>-</sup> Brønsted-correlation path of HY<sup>-</sup>(H<sub>2</sub>O)<sub>n=0-3</sub> (Y = O, S, HN) + CH<sub>3</sub>CH<sub>2</sub>Cl from the actual  $\Delta H^\ddagger$ (HOO<sup>-</sup>) values of HOO<sup>-</sup>(H<sub>2</sub>O)<sub>n=0-3</sub> + CH<sub>3</sub>CH<sub>2</sub>Cl.<sup>[a]</sup>

| <b>n</b> | <b>Path</b>           | <b><math>\Delta H^\ddagger</math>(actual)</b> | <b><math>\Delta H^\ddagger</math>(HO<sup>-</sup> Brønsted path)</b> | <b><math>\Delta\Delta H^\ddagger</math>(deviation)</b> |
|----------|-----------------------|-----------------------------------------------|---------------------------------------------------------------------|--------------------------------------------------------|
| 0        | S <sub>N</sub> 2-path | -13.8                                         | -7.3                                                                | 6.5                                                    |
| 0        | E2-path               | -12.6                                         | -3.5                                                                | 9.1                                                    |
| 1        | S <sub>N</sub> 2-path | -3.8                                          | 0.5                                                                 | 4.3                                                    |
| 1        | E2-path               | 0.1                                           | 5.9                                                                 | 5.8                                                    |
| 2        | S <sub>N</sub> 2-path | 1.7                                           | 4.5                                                                 | 2.9                                                    |
| 2        | E2-path               | 6.9                                           | 11.5                                                                | 4.5                                                    |
| 3        | S <sub>N</sub> 2-path | 4.1                                           | 8.4                                                                 | 4.3                                                    |
| 3        | E2-path               | 12.5                                          | 14.7                                                                | 2.2                                                    |

[a] Computed at CCSD(T)/aug-cc-pVTZ//MP2/6-311++(d,p). Graphical representation in Figure S14.

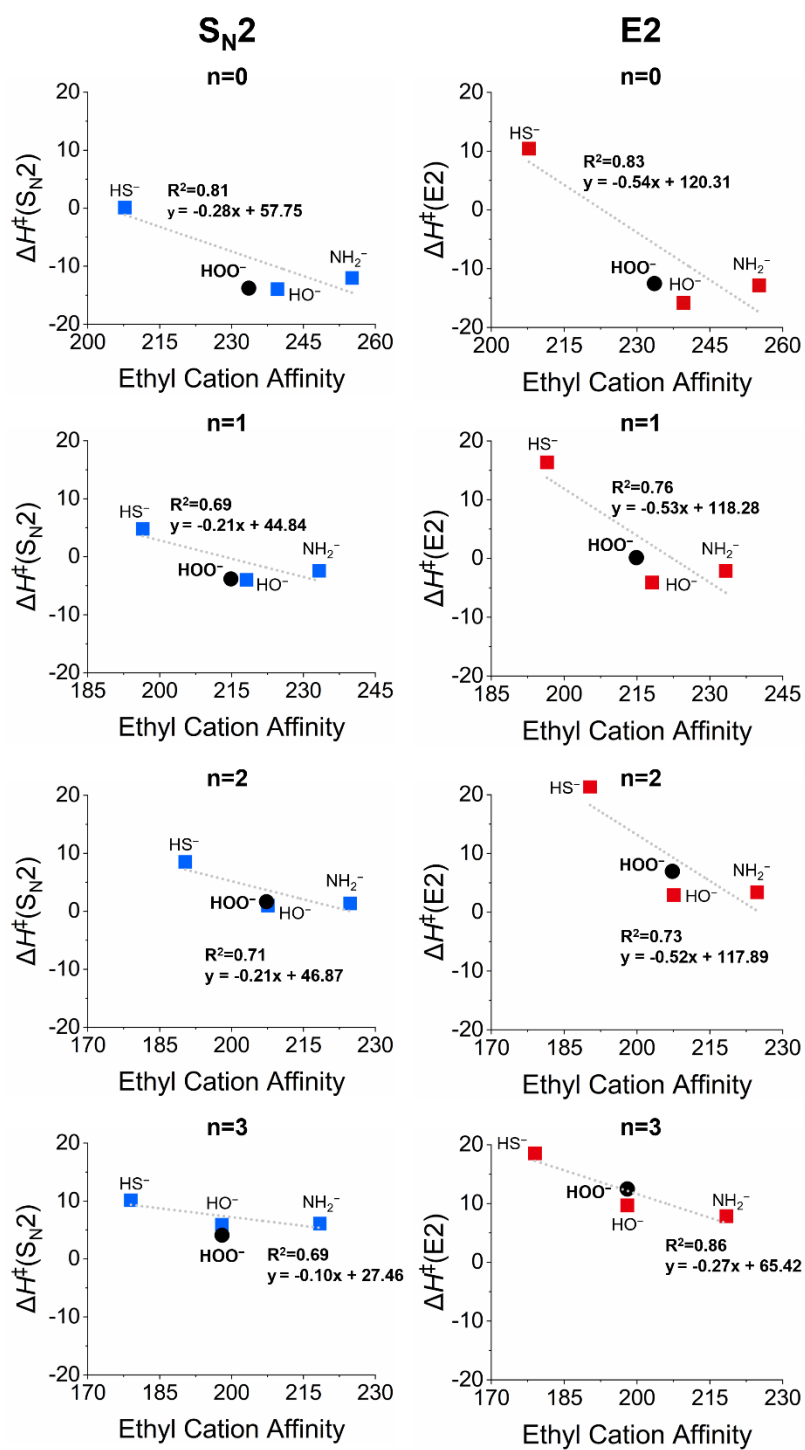

**Figure S15.** Correlation of  $\text{HY}^-(\text{H}_2\text{O})_n$  ( $\text{Y} = \text{O}, \text{S}, \text{HN}$ ) +  $\text{CH}_3\text{CH}_2\text{Cl}$  reaction barrier height  $\Delta H^\ddagger$  with ECA (in kcal/mol;  $\text{S}_{\text{N}}2$  path = blue;  $\text{E}2$  path = red), computed at CCSD(T)/aug-cc-pVTZ//MP2/6-311++G(d,p). The data of the  $\text{HOO}^-$ -w-path can be found in Table S11.

**Table S11.** Deviation  $\Delta\Delta H^\ddagger$  (in kcal/mol) of reaction barriers  $\Delta H^\ddagger$ (HY<sup>-</sup> Brønsted path ECA) derived from the ethyl-cation-affinity-based HY<sup>-</sup> Brønsted-correlation path of HY<sup>-</sup>(H<sub>2</sub>O)<sub>n=0-3</sub> (Y = O, S, HN) + CH<sub>3</sub>CH<sub>2</sub>Cl from the actual  $\Delta H^\ddagger$ (HOO<sup>-</sup>) values of HOO<sup>-</sup>(H<sub>2</sub>O)<sub>n=0-3</sub> + CH<sub>3</sub>CH<sub>2</sub>Cl.<sup>[a]</sup>

| <b>n</b> | <b>Path</b>           | <b><math>\Delta H^\ddagger</math>(actual)</b> | <b><math>\Delta H^\ddagger</math>(HO<sup>-</sup> Brønsted path)</b> | <b><math>\Delta\Delta H^\ddagger</math>(deviation)</b> |
|----------|-----------------------|-----------------------------------------------|---------------------------------------------------------------------|--------------------------------------------------------|
| 0        | S <sub>N</sub> 2-path | -13.8                                         | -8.5                                                                | 5.3                                                    |
| 0        | E2-path               | -12.6                                         | -5.8                                                                | 6.8                                                    |
| 1        | S <sub>N</sub> 2-path | -3.8                                          | -0.3                                                                | 3.5                                                    |
| 1        | E2-path               | 0.1                                           | 3.9                                                                 | 3.8                                                    |
| 2        | S <sub>N</sub> 2-path | 1.7                                           | 3.7                                                                 | 2.0                                                    |
| 2        | E2-path               | 6.9                                           | 9.4                                                                 | 2.4                                                    |
| 3        | S <sub>N</sub> 2-path | 4.1                                           | 7.4                                                                 | 3.3                                                    |
| 3        | E2-path               | 12.5                                          | 12.1                                                                | -0.3                                                   |

[a] Computed at CCSD(T)/aug-cc-pVTZ//MP2/6-311++(d,p). Graphical representation in Figure S15.

## References

- [1] Gaussian 16 (Rev. A.03), M. J. Frisch, G. W. Trucks, H. B. Schlegel, G. E. Scuseria, M. A. Robb, J. R. Cheeseman, G. Scalmani, V. Barone, G. A. Petersson, H. Nakatsuji, X. Li, M. Caricato, A. V. Marenich, J. Bloino, B. G. Janesko, R. Gomperts, B. Mennucci, H. P. Hratchian, J. V. Ortiz, A. F. Izmaylov, J. L. Sonnenberg, Williams, F. Ding, F. Lipparini, F. Egidi, J. Goings, B. Peng, A. Petrone, T. Henderson, D. Ranasinghe, V. G. Zakrzewski, J. Gao, N. Rega, G. Zheng, W. Liang, M. Hada, M. Ehara, K. Toyota, R. Fukuda, J. Hasegawa, M. Ishida, T. Nakajima, Y. Honda, O. Kitao, H. Nakai, T. Vreven, K. Throssell, J. A. Montgomery Jr., J. E. Peralta, F. Ogliaro, M. J. Bearpark, J. J. Heyd, E. N. Brothers, K. N. Kudin, V. N. Staroverov, T. A. Keith, R. Kobayashi, J. Normand, K. Raghavachari, A. P. Rendell, J. C. Burant, S. S. Iyengar, J. Tomasi, M. Cossi, J. M. Millam, M. Klene, C. Adamo, R. Cammi, J. W. Ochterski, R. L. Martin, K. Morokuma, O. Farkas, J. B. Foresman, D. J. Fox, Gaussian, Inc., Wallingford, CT, **2016**.
- [2] T. Lu, F. Chen, *J. Comput. Chem.* **2012**, *33*, 580.
